# Supplementary material
Source: PubMed Central journal article supplement (PMC3524594)

# **NHC–Cu-Catalyzed Silyl Conjugate Additions to Acyclic and Cyclic Dienones and Dienonates. Efficient Site-, Diastereo- and Enantioselective Synthesis of Carbonyl-Containing Allylsilanes**

Kang-sang Lee, Hao Wu, Fredrik Haeffner and Amir H. Hoveyda\*

*Department of Chemistry, Merkert Chemistry Center,  
Boston College, Chestnut Hill, Massachusetts 02467*

## **SUPPORTING INFORMATION, PART II**

### **Table of Contents**

|                                      |              |
|--------------------------------------|--------------|
| Compounds <b>3a–3e</b>               | Page S2–S6   |
| Compounds in Table 3                 | Page S7–S13  |
| Compounds in Table 4                 | Page S14–S21 |
| Compound <b>19</b> and its Precursor | Page S22–S23 |
| Compound <b>2a</b>                   | Page S24     |
| Starting Materials of <b>3b–3e</b>   | Page S25–S28 |
| Starting Materials of <b>8a–12</b>   | Page S29–S35 |
| Starting Materials of <b>13–17</b>   | Page S36–S40 |
| Compound <b>Z-18</b>                 | Page S41     |



Sample: 6L-26-384  
Pulse: 40P  
Pulse sequence: zgpg30

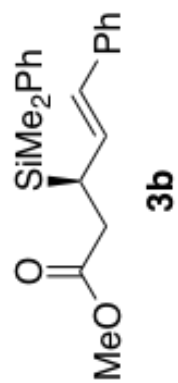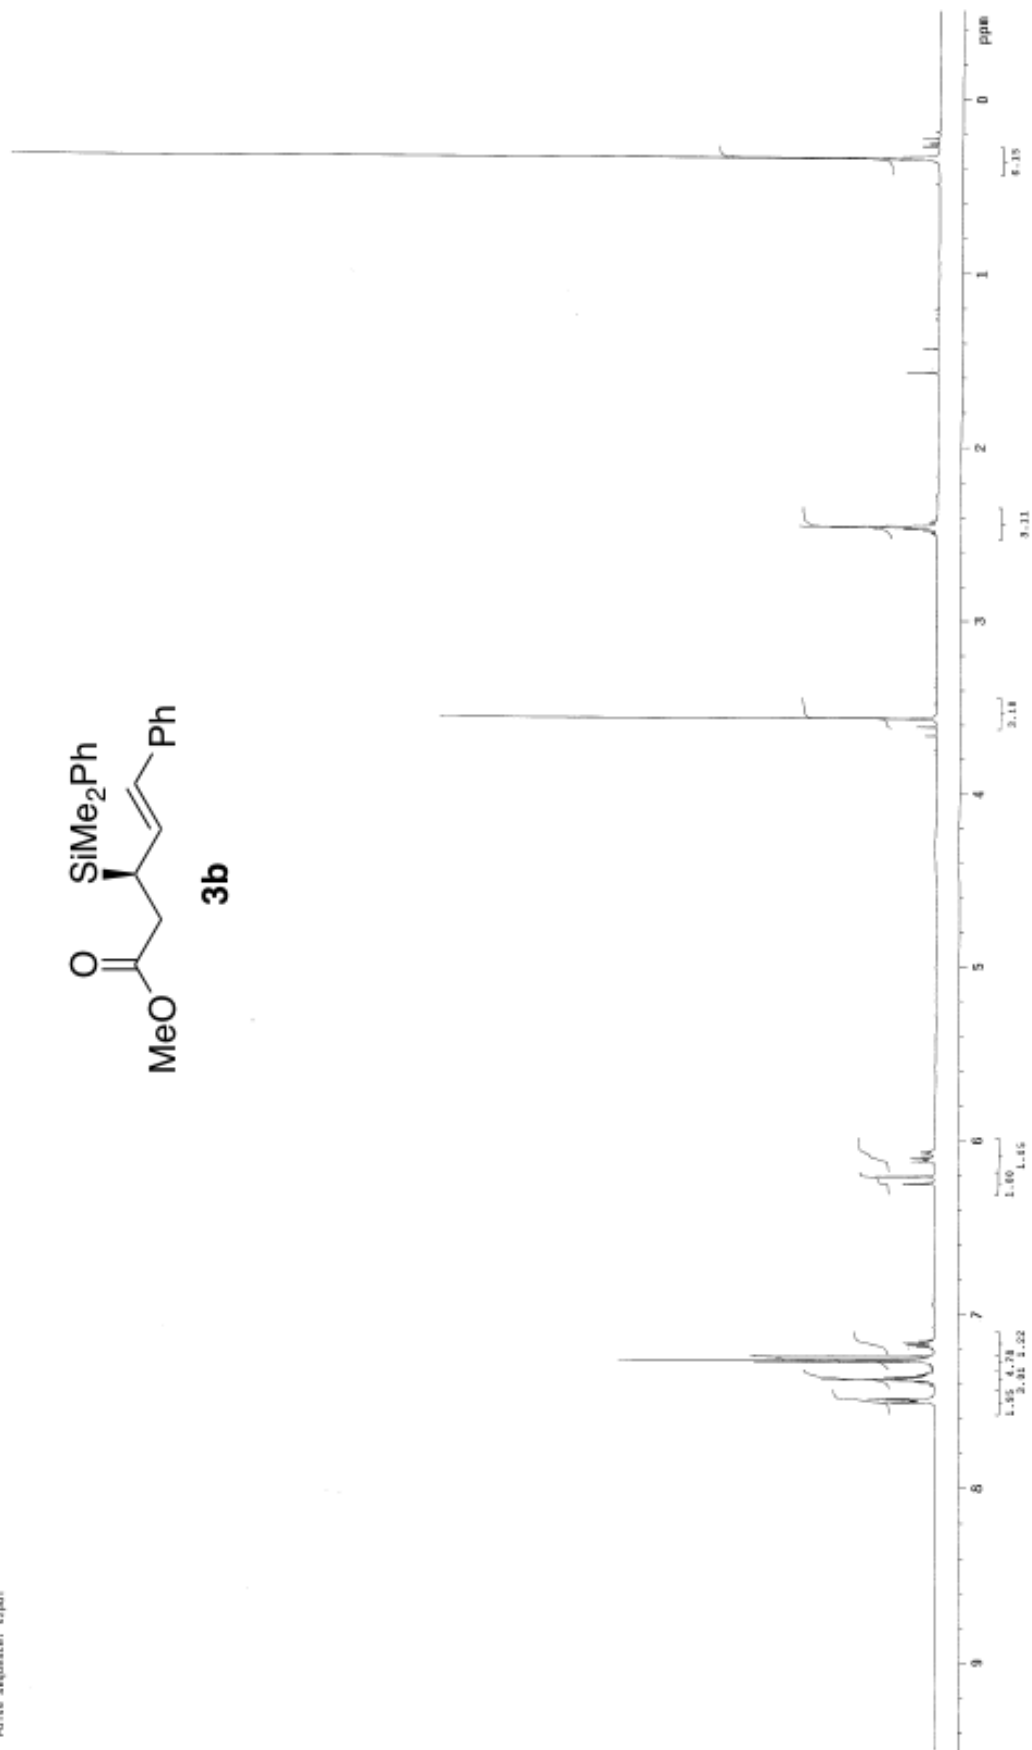

Sample: MW-1-157-2  
 File: exp

Pulse Sequence: zgpg30

Solvent: cdcl3  
 Temp: 25.0 C / 298.1 K  
 Operator: wjhr  
 VNAME: 400 -vnmr13\*

Relax. delay: 1.000 sec  
 Pulse: 45.0 degrees  
 Acq. time: 2.000 sec  
 Width: 4807.7 Hz  
 Frequency: 99.626100 MHz  
 Q1: 399.7832141 MHz  
 DATE\_ PROCESSED:   
 Resol: enhancement -0.8 Hz  
 FT size: 6535  
 Total time: 3 min, 21 sec

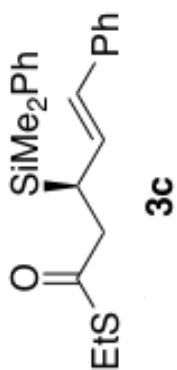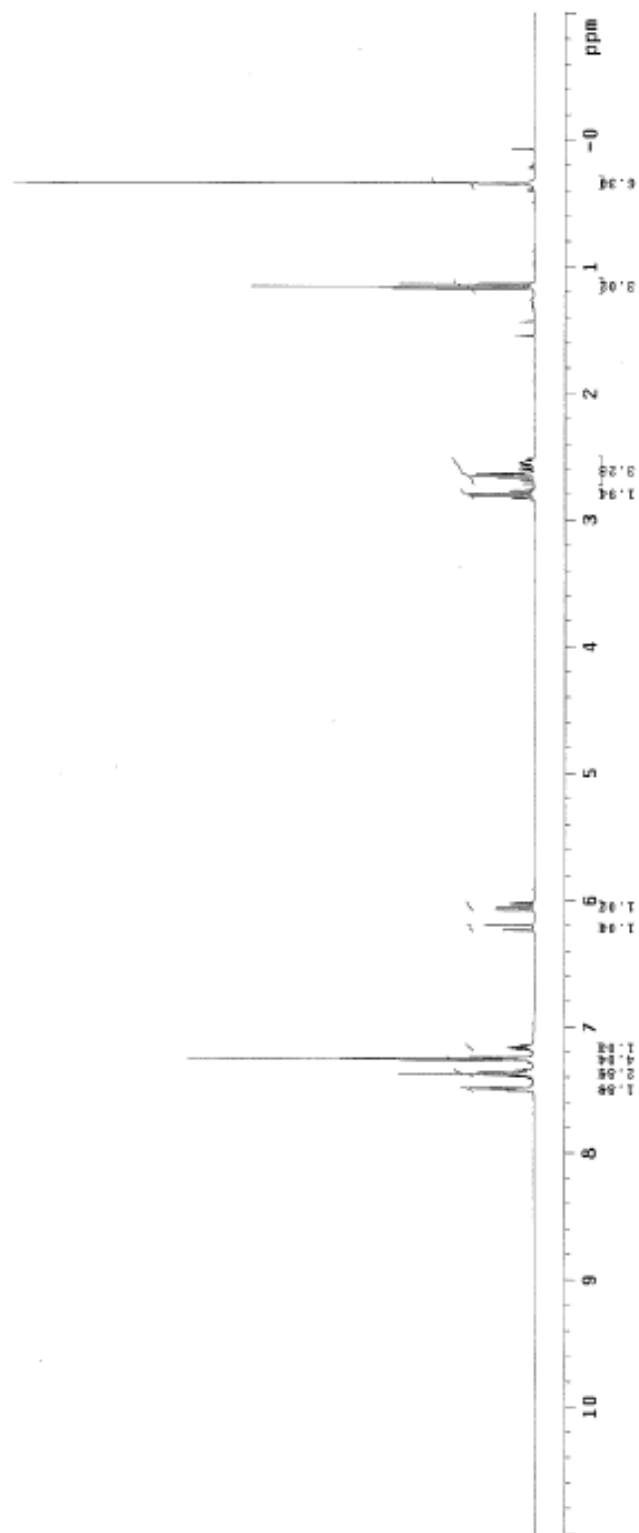

Sample: 41-EP-233-1H  
 File: 41p  
 Pulse Program: zgpg30  
 Solvent: CDCl<sub>3</sub>  
 Concentration: 10.00 mg/ml  
 OBSERVED: 100.627, 101.618, 1  
 VNAME: 41p  
 VNAME1: 41p  
 Relax delay: 1.000 sec  
 Aq: 1.000 sec  
 Acq. time: 2.460 sec  
 USZN: 886.4 Hz  
 USZN1: 886.4 Hz  
 OBSERVED: 1H: 209.783131 MHz  
 DATA PROCESSING  
 FT 4110 81928  
 Total time: 3 min, 21 sec

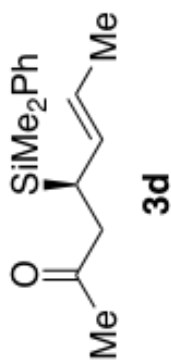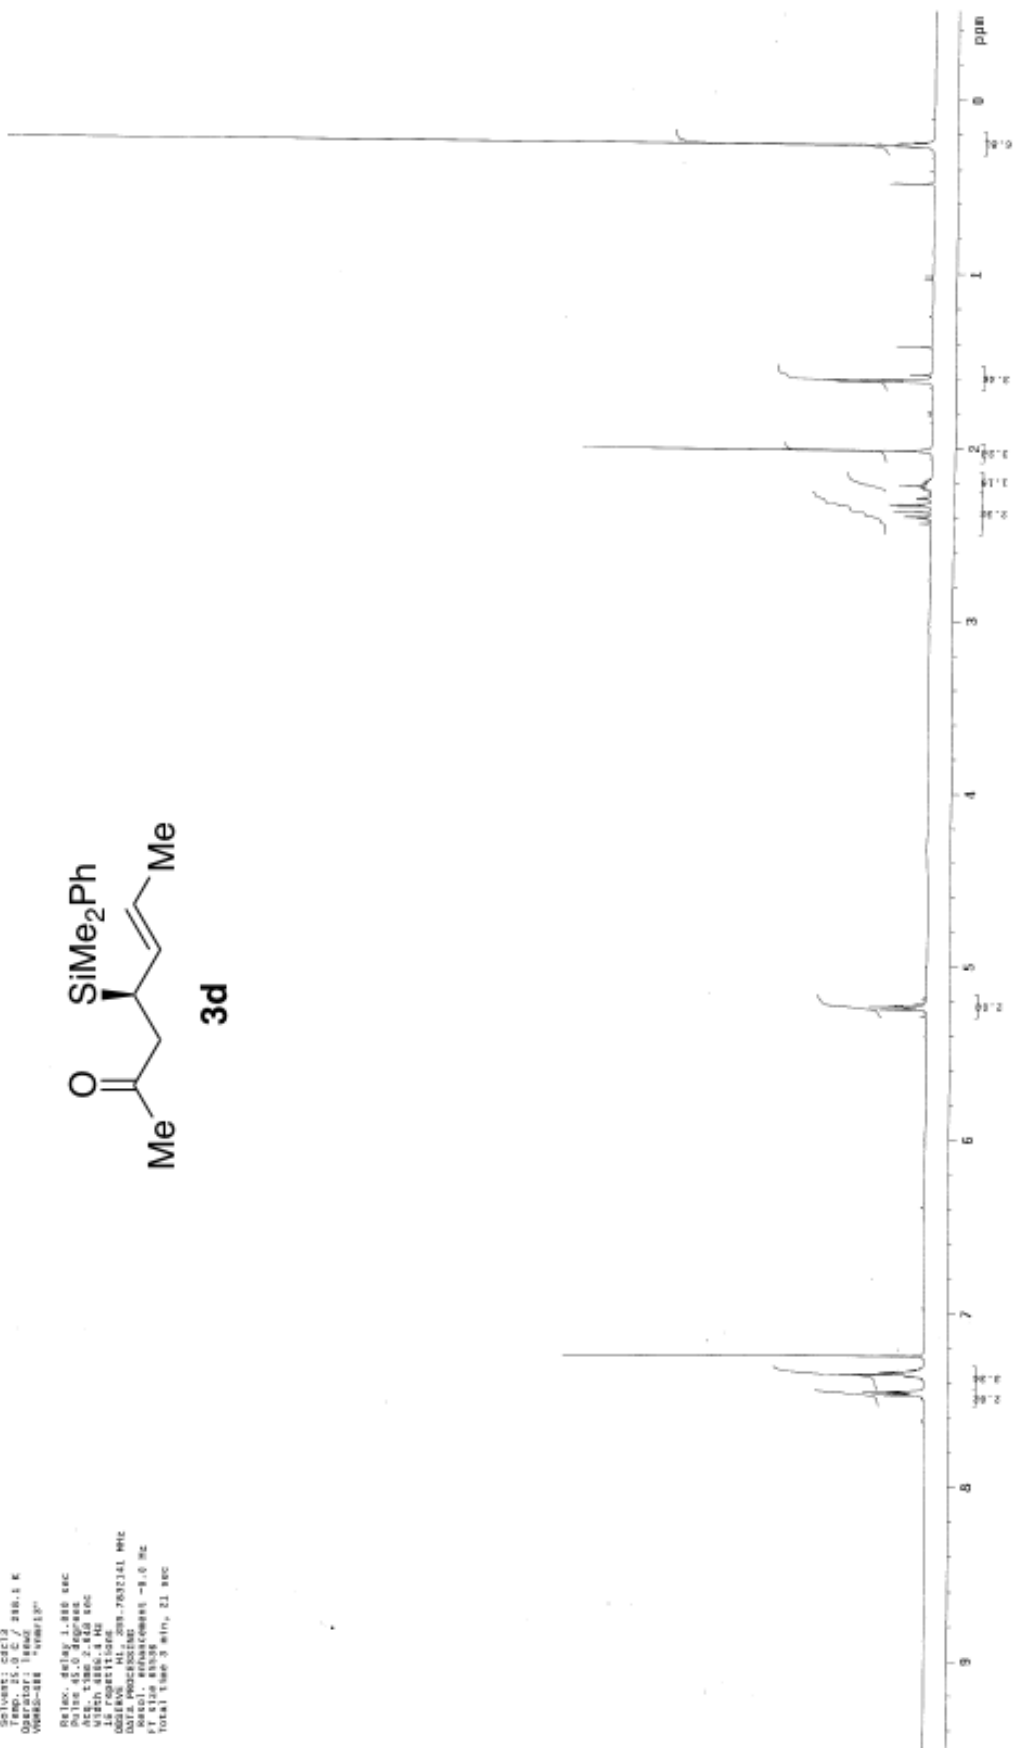

Sample: MW-1-091  
File: exp

Pulse Sequence: s2p01  
Solvent: cdcl3  
Temp: 25.8 C / 298.1 K  
Operator: wuhr  
vnmr3-000 "vnmr13"

Relax. delay 1.800 sec  
Pulse 45.0 degrees  
Acq. time 7.003 sec  
FIDIn 4881.7 Hz  
31PIn 125013.0 Hz  
OBSERVE F1: 399.7832161 MHz  
DATA PROCESSING  
Resol: enhancement -8.0 Hz  
FT size 65536  
Total time 3 min, 21 sec

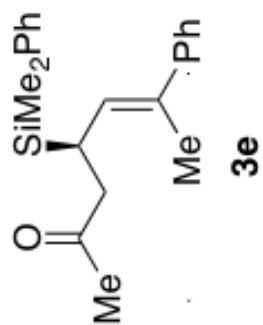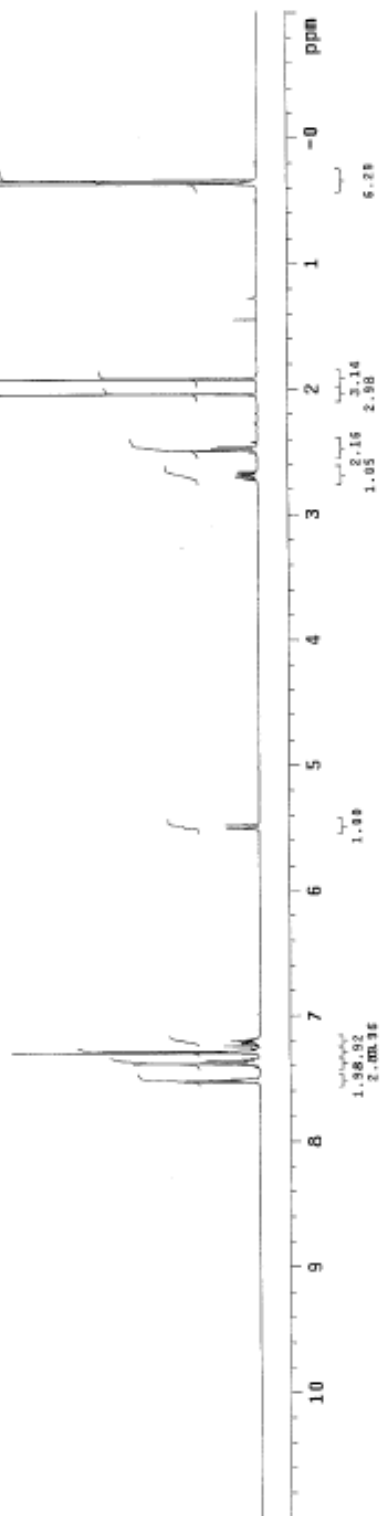

Sample: HM-I-119  
File: exp

Pulse Sequence: zgpg30

Solvent: cdcl3  
Temp: 25.0 C / 298.1 K  
Operator: mhr  
VME6-481 vsmr13"

Relax. delay 1.000 sec  
Pulse 45.0 degrees  
Acq. time 2.148 sec  
Width 4887.7 Hz  
38 repetitions  
OBSERVE H1 399.783141 MHz  
DATA PROCESSING  
Resol. enhancement -6.0 Hz  
FT size 6536  
Total time 3 min, 21 sec

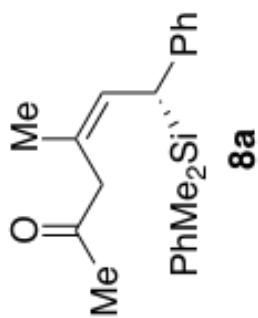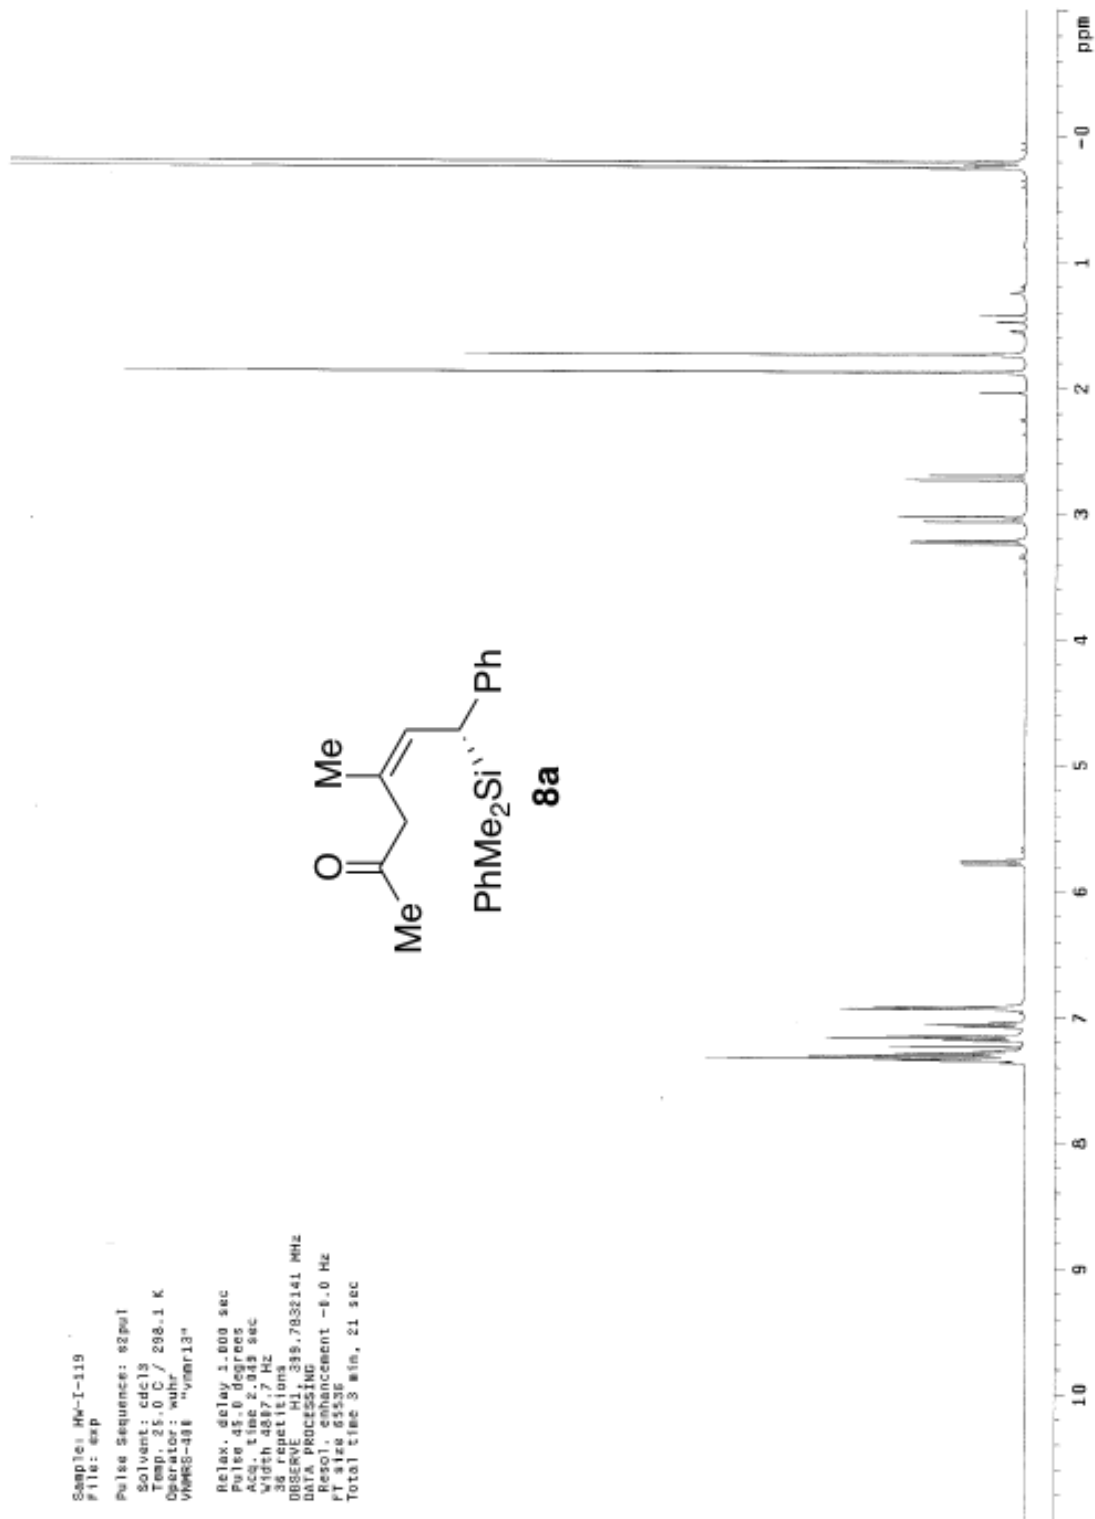

Sample: HW-1-132  
 File: exp  
 Pulse Sequence: zgpg30  
 Solvent: cdcl3  
 Temp: 25.8 C / 298.1 K  
 Omega: 125.763 MHz  
 VPROB: zgpg30  
 Relax: delay 1.888 sec  
 Acq: 400.136 MHz  
 Acq: time 3.849 sec  
 Width: 4007.7 Hz  
 25 repetitions  
 OBSERVE: M1, 389.7832141 MHz  
 DATA PROCESSING  
 Resol: enhancement -0.0 Hz  
 F1 size 45536  
 Total time 3 min, 21 sec

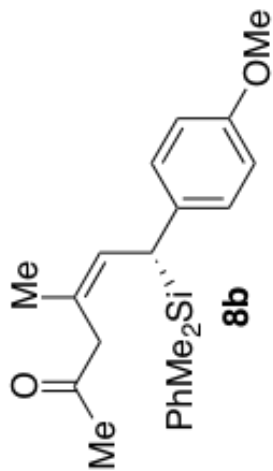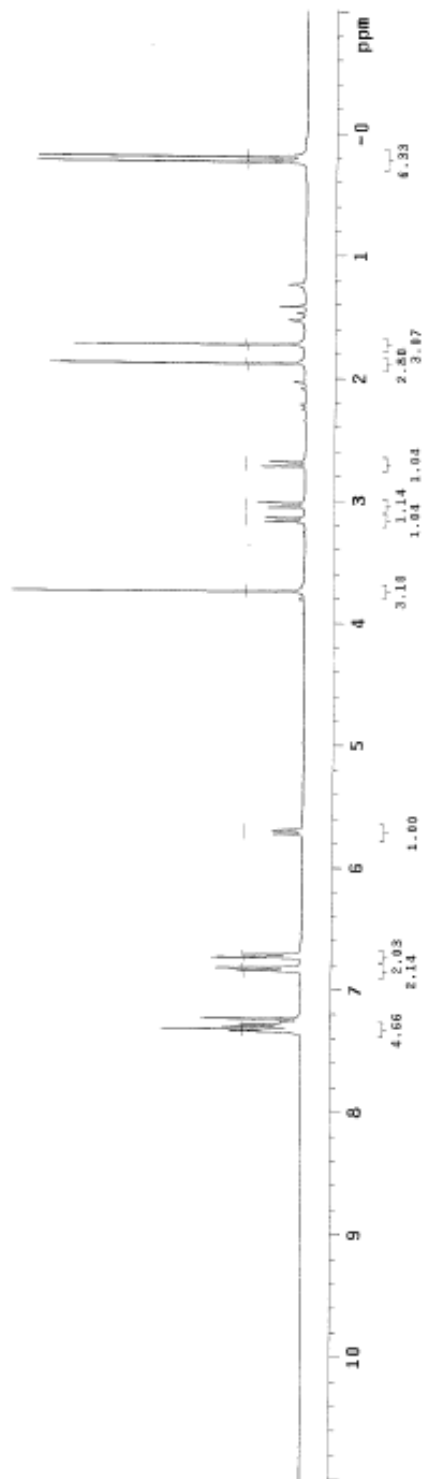



Sample: HN-1-132  
 File: exp  
 Pulse Sequence: zgpg30  
 Solvent: cdcl3  
 Temp: 25.0 C / 298.1 K  
 Acq. Date: 2013-01-13  
 VENDOR: Varian  
 Relax. delay: 1.000 sec  
 Pulse: zgpg30  
 Acq. Time: 2.669 sec  
 Width: 4807.7 Hz  
 SR: 38 repetitions  
 OBSERVE: H1, 399.7632141 MHz  
 Resol: enhancement -0.8 Hz  
 FT Size: 65536  
 Total Time: 3 min, 21 sec

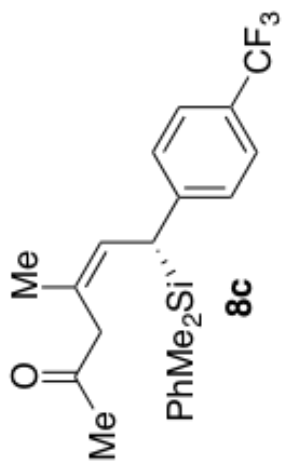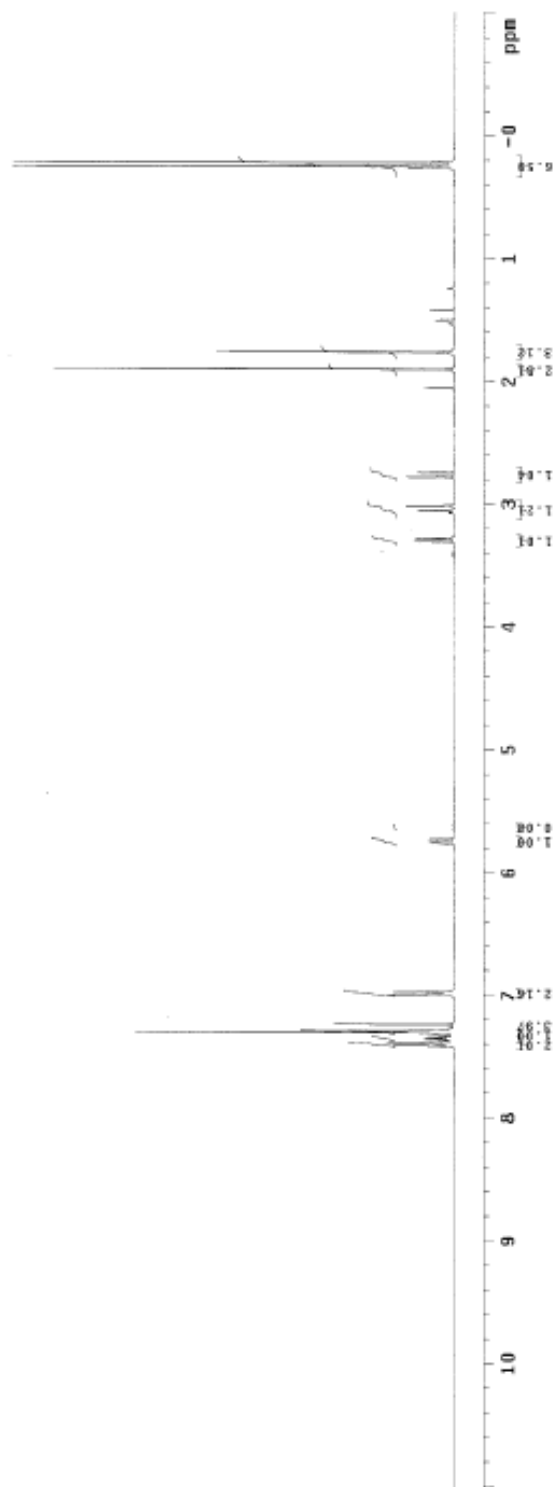

Sample: HN-2-142  
File: exp

Pulse Sequence: zgpg30  
Solvent: cdcl3  
Temp: 25.0 C / 298.1 K  
Operator: vahr  
VNMRS-460 "vnmr13"

Relax. delay 1.000 sec  
Pulse 45.0 degrees  
Acq. time 2.669 sec  
Width 4807.7 Hz  
# of repetitions 509.7532141 MHz  
DATE\_ PROCESSED  
Rerol. enhancement -0.0 Hz  
F1 size 6536  
Total time 3 min, 21 sec

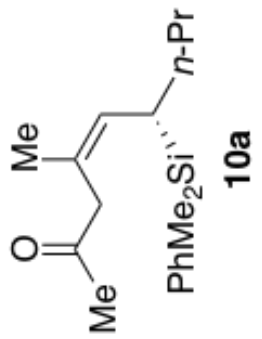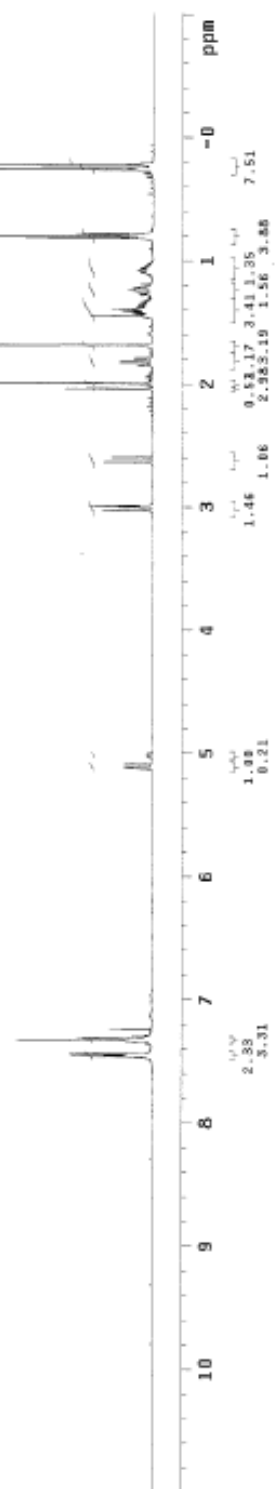

Sample: HM-1-138  
File: exp

Pulse Sequence: s2pul  
Solvent: cdcl3  
Temp: 25.0 C / 298.1 K  
Operator: wuhr  
vnmr5-418 "vnmr13"

Relax. delay 1.000 sec  
Pulse 45.0 degrees  
Acq. time 2.810 sec  
Width 4807.7 Hz  
SOLVENT  
ORBITAL POSITION 89.7832141 MHz  
DATA PROCESSING  
Resol. enhancement -0.0 Hz  
FT size 65836  
Total time 3 min, 21 sec

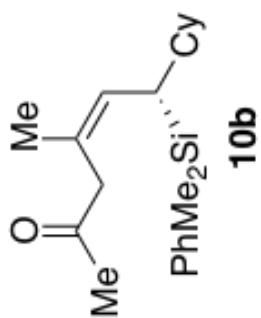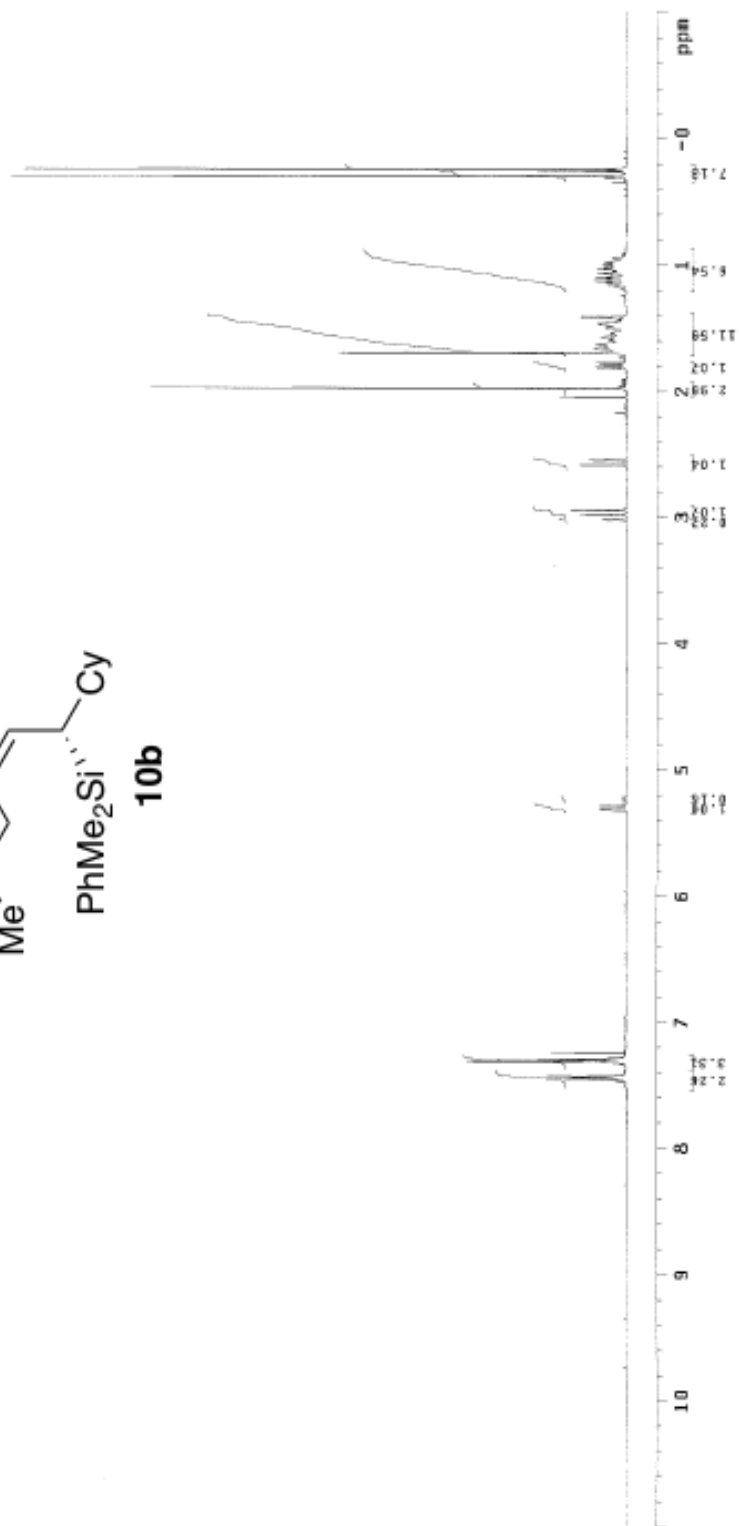

Sample: MWJ-145-3

File: 648

Pulse Sequence: zgpg30

Solvent: CDCl3

Temp: 25.0 C / 298.1 K

Operator: wuhr/vmr13

VNMR5-600 "vnmr13"

Relax. delay: 1.000 sec

Pulse: 45.0 degrees

Acq. time: 2.049 sec

Width: 4807.7 Hz

32 repetitions

OBSERVE: H1, 399.7832141 MHz

DATA PROCESSING

Frequency offset: -0.6 Hz

Total time: 3 min, 21 sec

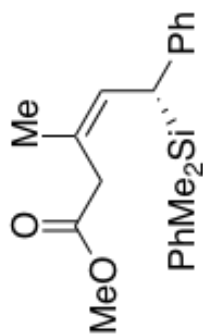

11

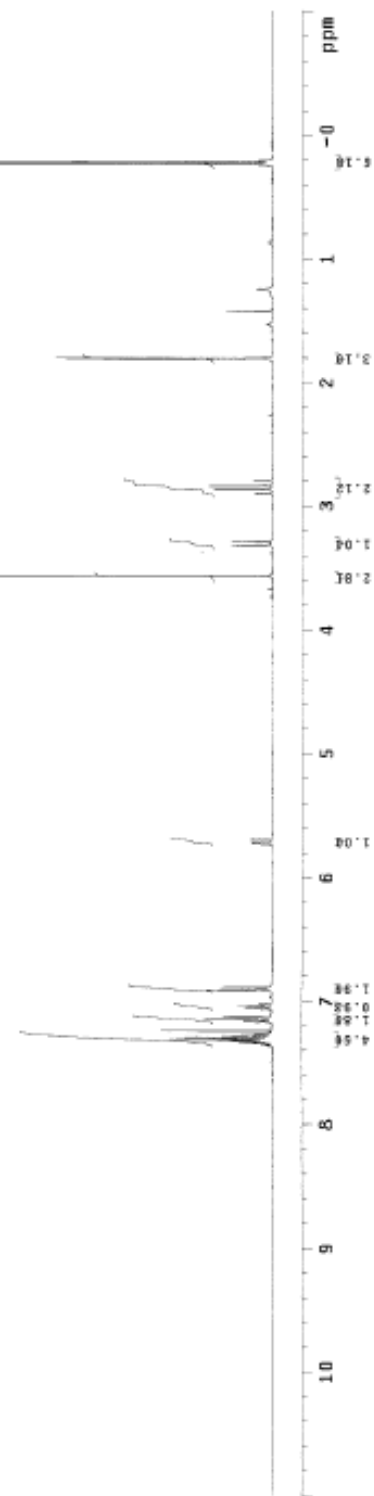

Sample: Mw-1-151  
 File: exp

Pulse Sequence: zgpg30  
 Solvent: cdcl3  
 Temp: 25.00 C / 298.1 K  
 Operator: mh / mar11  
 INOVA-500 "mr11"

Relax. delay: 1.000 sec  
 Pulse: 45.0 degrees  
 Acq. time: 3.986 sec  
 Width: 5987.5 Hz  
 24 repetitions  
 OBSERVE: M1, 499.7728124 MHz  
 DATA PROCESSING  
 Resol.: enhancement -8.0 Hz  
 FT S'ize: 85526  
 Total time: 2 min, 25 sec

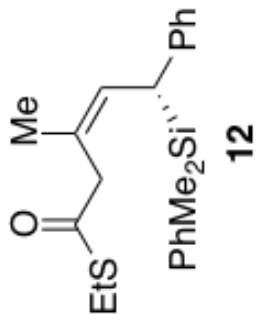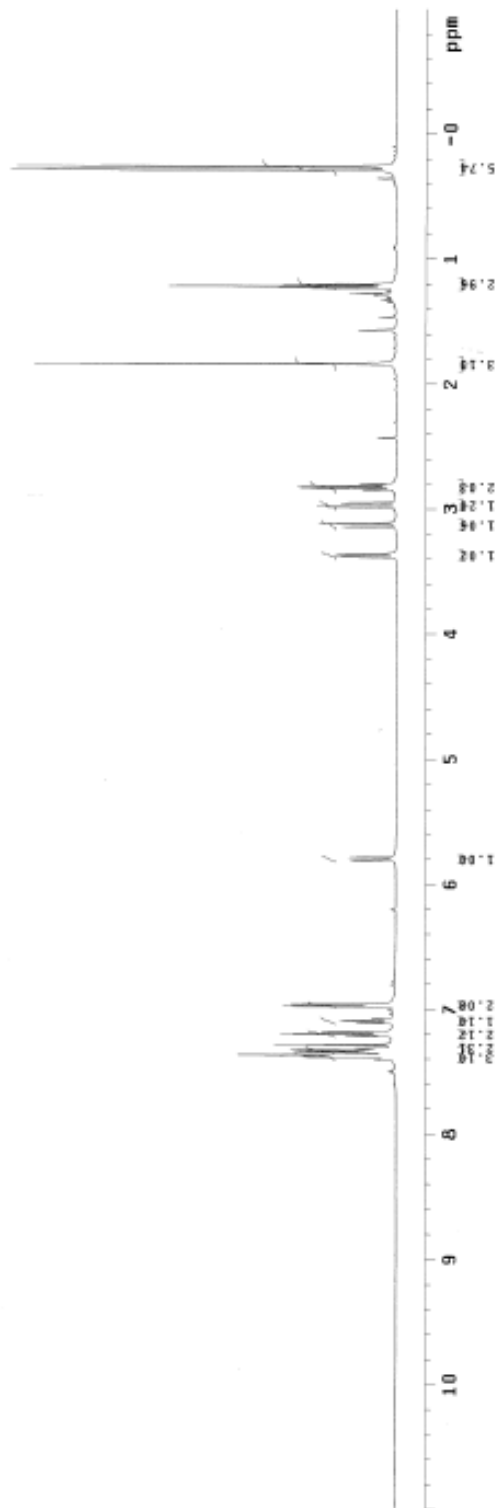

Sample: 6L-DK-287-1-L8  
 File: exp  
 Pulse Sequence: zgpg30  
 Solvent: cdcl3  
 Temp: 29.8 C / 286.1 K  
 VPROB: zgpg30  
 VPPROB: zgpg30  
 Melin: 401kg 1.122 640  
 Acq: 1.122 640  
 Acq Time: 2.045 sec  
 N: 640  
 N/Hz: 4866.4 Hz  
 032402111003-7032141 MHz  
 DATA: 03012252M3  
 F2: 125.761 MHz  
 F1: 500.136 MHz  
 Total time 3 min, 21 sec

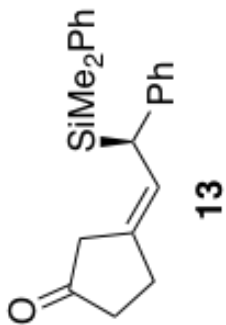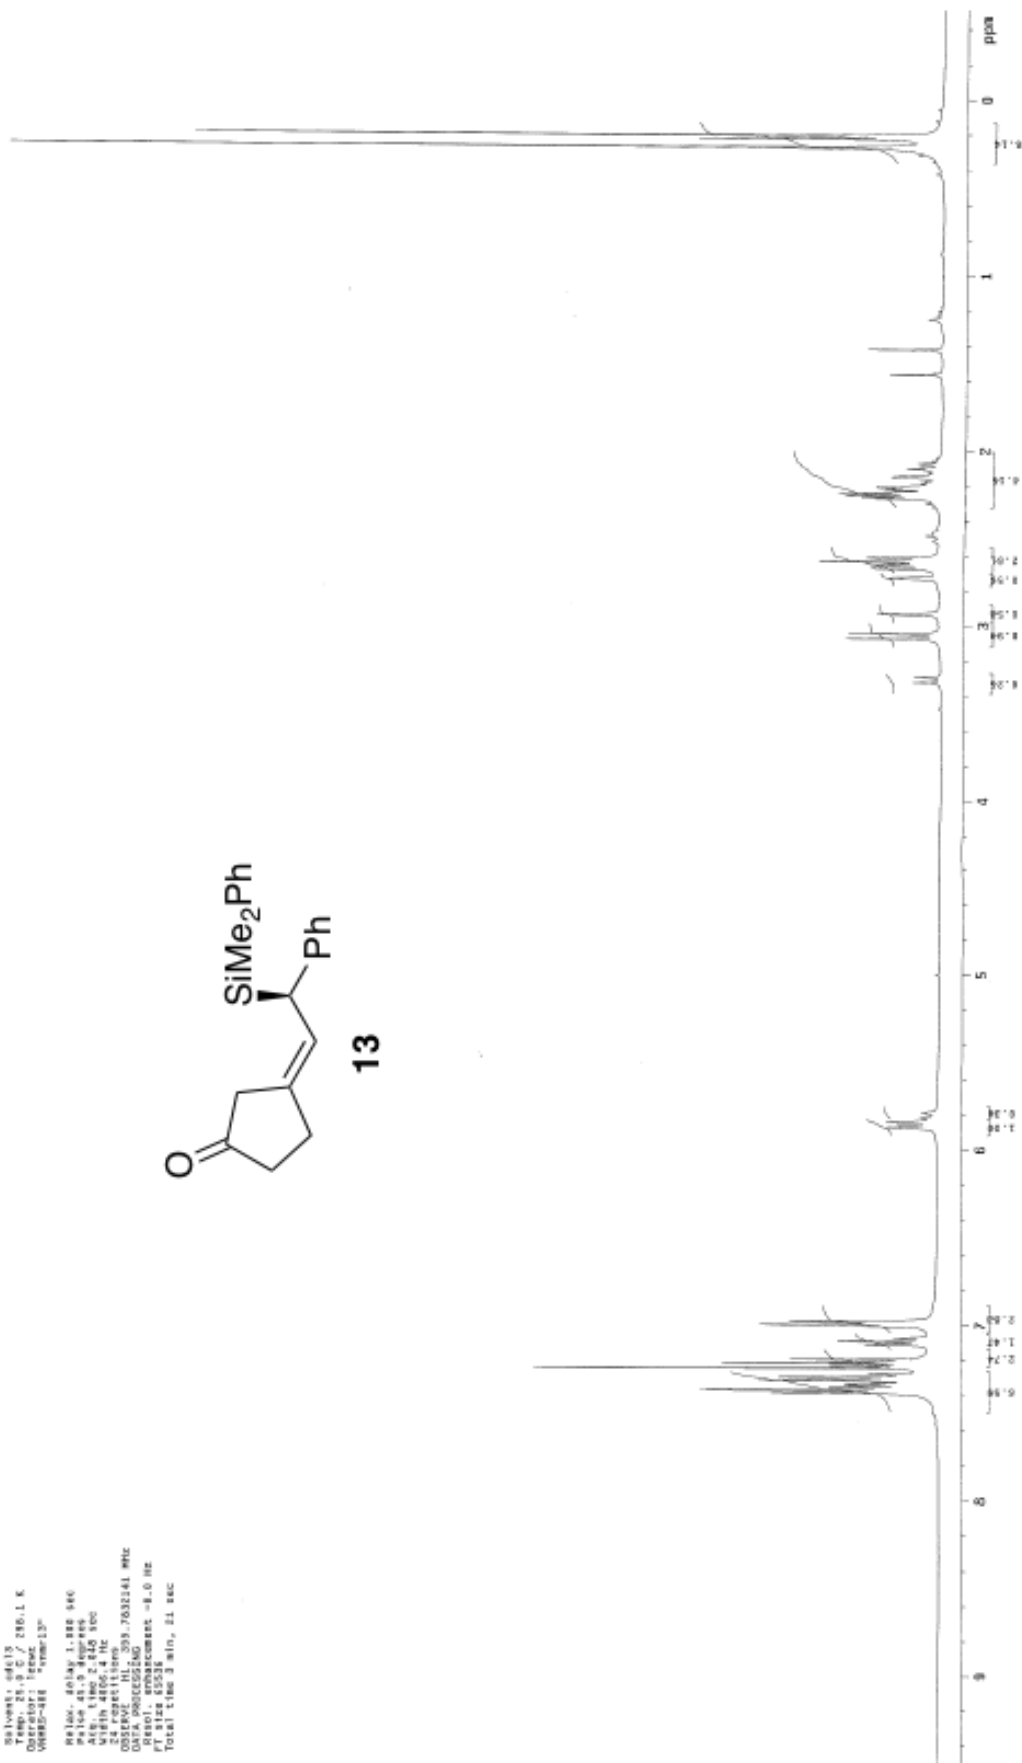

Sample: KL-20-108-1H  
 File: exp  
 Pulse sequence: zgpg30  
 Solvent: cdcl3  
 Temp: 25.3 C / 298.1 K  
 VPROB: zgpg30  
 VENDOR: agilent  
 Acq. delay: 1.000 sec  
 Pulse: zgpg30  
 Flip: 15.0 degrees  
 Width: 2000.0 Hz  
 VWidth: 4000.0 Hz  
 EQ: 2.0000000000000000  
 DECOUPLING: 7820141 MHz  
 DATA PROCESSING  
 SFO: 100.626151 MHz  
 AQC: 0.0000000000000000  
 SFO2: 100.626151 MHz  
 Total time 2 min, 21 sec

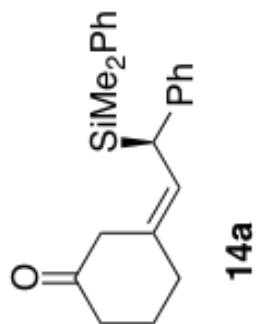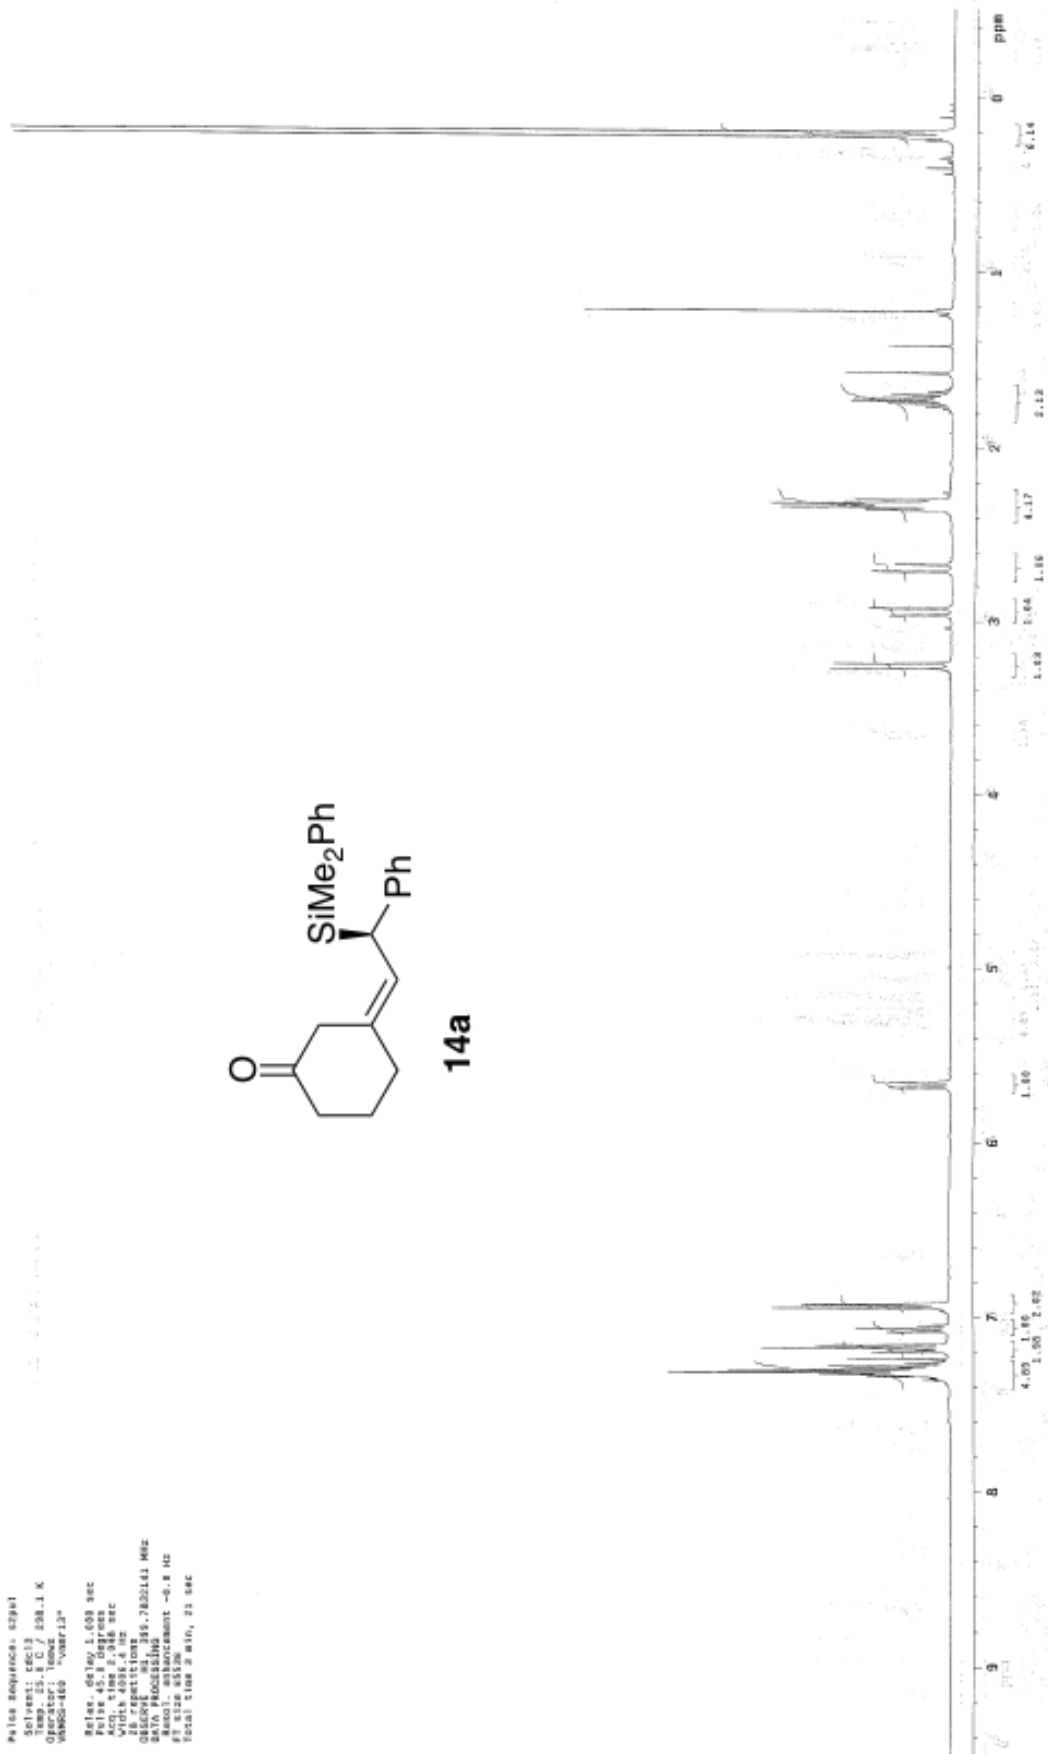

Sample: 6L-D0627a-01H  
 File: exp  
 Pulse Sequence: zgpg30  
 Solvent: cdcl3  
 Temp: 25.0 C / 298.1 K  
 Operator: leed  
 V0605-001 "zgpg30"  
 Relax, delay 1.000 sec  
 Pulse 45.0 degree  
 Acq. 1.000 sec  
 163h 38m 4 sec  
 16 repetitions  
 007460030109\_7622411.mlx  
 Date\_20160303  
 Rec1: enhanced -s 0 Hz  
 F1 size 65536  
 Total time 2.810, 21 sec

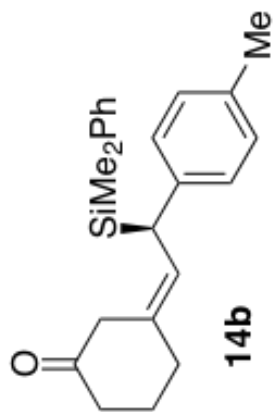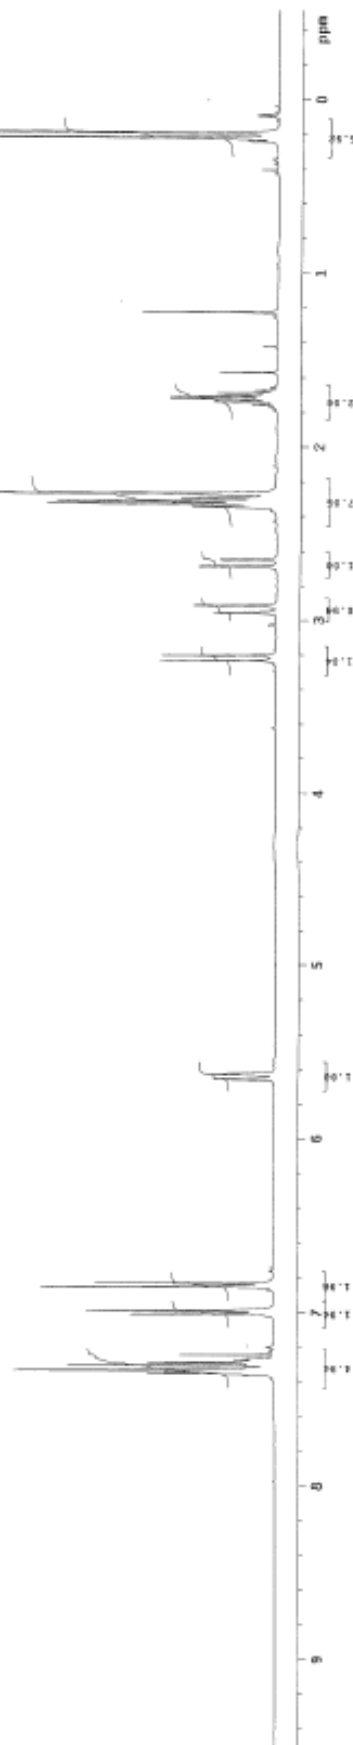



Sample: KL-10-277-3H  
 File: 009  
 Pulse Sequence: zgpg30  
 Solvent: cdcl3  
 Temp: 25.4 C / 298.1 K  
 VPROB: zgpg30 129mm13\*  
 Relax delay: 3.000 sec  
 Acq: 16384  
 F2: 101.626 MHz  
 WIDW: 4388.4 Hz  
 SFO: 400.146 MHz  
 D1: 2.00000000  
 D11: 0.05000000  
 D12: 0.05000000  
 D13: 0.05000000  
 D14: 0.05000000  
 D15: 0.05000000  
 D16: 0.05000000  
 D17: 0.05000000  
 D18: 0.05000000  
 D19: 0.05000000  
 D20: 0.05000000  
 D21: 0.05000000  
 D22: 0.05000000  
 D23: 0.05000000  
 D24: 0.05000000  
 D25: 0.05000000  
 D26: 0.05000000  
 D27: 0.05000000  
 D28: 0.05000000  
 D29: 0.05000000  
 D30: 0.05000000  
 D31: 0.05000000  
 D32: 0.05000000  
 D33: 0.05000000  
 D34: 0.05000000  
 D35: 0.05000000  
 D36: 0.05000000  
 D37: 0.05000000  
 D38: 0.05000000  
 D39: 0.05000000  
 D40: 0.05000000  
 D41: 0.05000000  
 D42: 0.05000000  
 D43: 0.05000000  
 D44: 0.05000000  
 D45: 0.05000000  
 D46: 0.05000000  
 D47: 0.05000000  
 D48: 0.05000000  
 D49: 0.05000000  
 D50: 0.05000000  
 D51: 0.05000000  
 D52: 0.05000000  
 D53: 0.05000000  
 D54: 0.05000000  
 D55: 0.05000000  
 D56: 0.05000000  
 D57: 0.05000000  
 D58: 0.05000000  
 D59: 0.05000000  
 D60: 0.05000000  
 D61: 0.05000000  
 D62: 0.05000000  
 D63: 0.05000000  
 D64: 0.05000000  
 D65: 0.05000000  
 D66: 0.05000000  
 D67: 0.05000000  
 D68: 0.05000000  
 D69: 0.05000000  
 D70: 0.05000000  
 D71: 0.05000000  
 D72: 0.05000000  
 D73: 0.05000000  
 D74: 0.05000000  
 D75: 0.05000000  
 D76: 0.05000000  
 D77: 0.05000000  
 D78: 0.05000000  
 D79: 0.05000000  
 D80: 0.05000000  
 D81: 0.05000000  
 D82: 0.05000000  
 D83: 0.05000000  
 D84: 0.05000000  
 D85: 0.05000000  
 D86: 0.05000000  
 D87: 0.05000000  
 D88: 0.05000000  
 D89: 0.05000000  
 D90: 0.05000000  
 D91: 0.05000000  
 D92: 0.05000000  
 D93: 0.05000000  
 D94: 0.05000000  
 D95: 0.05000000  
 D96: 0.05000000  
 D97: 0.05000000  
 D98: 0.05000000  
 D99: 0.05000000  
 D100: 0.05000000  
 Total time 3 min, 24 sec

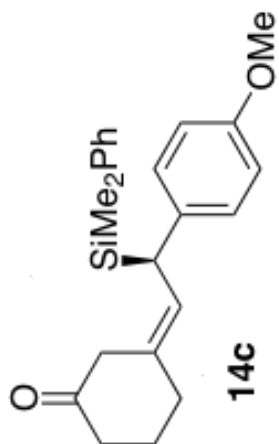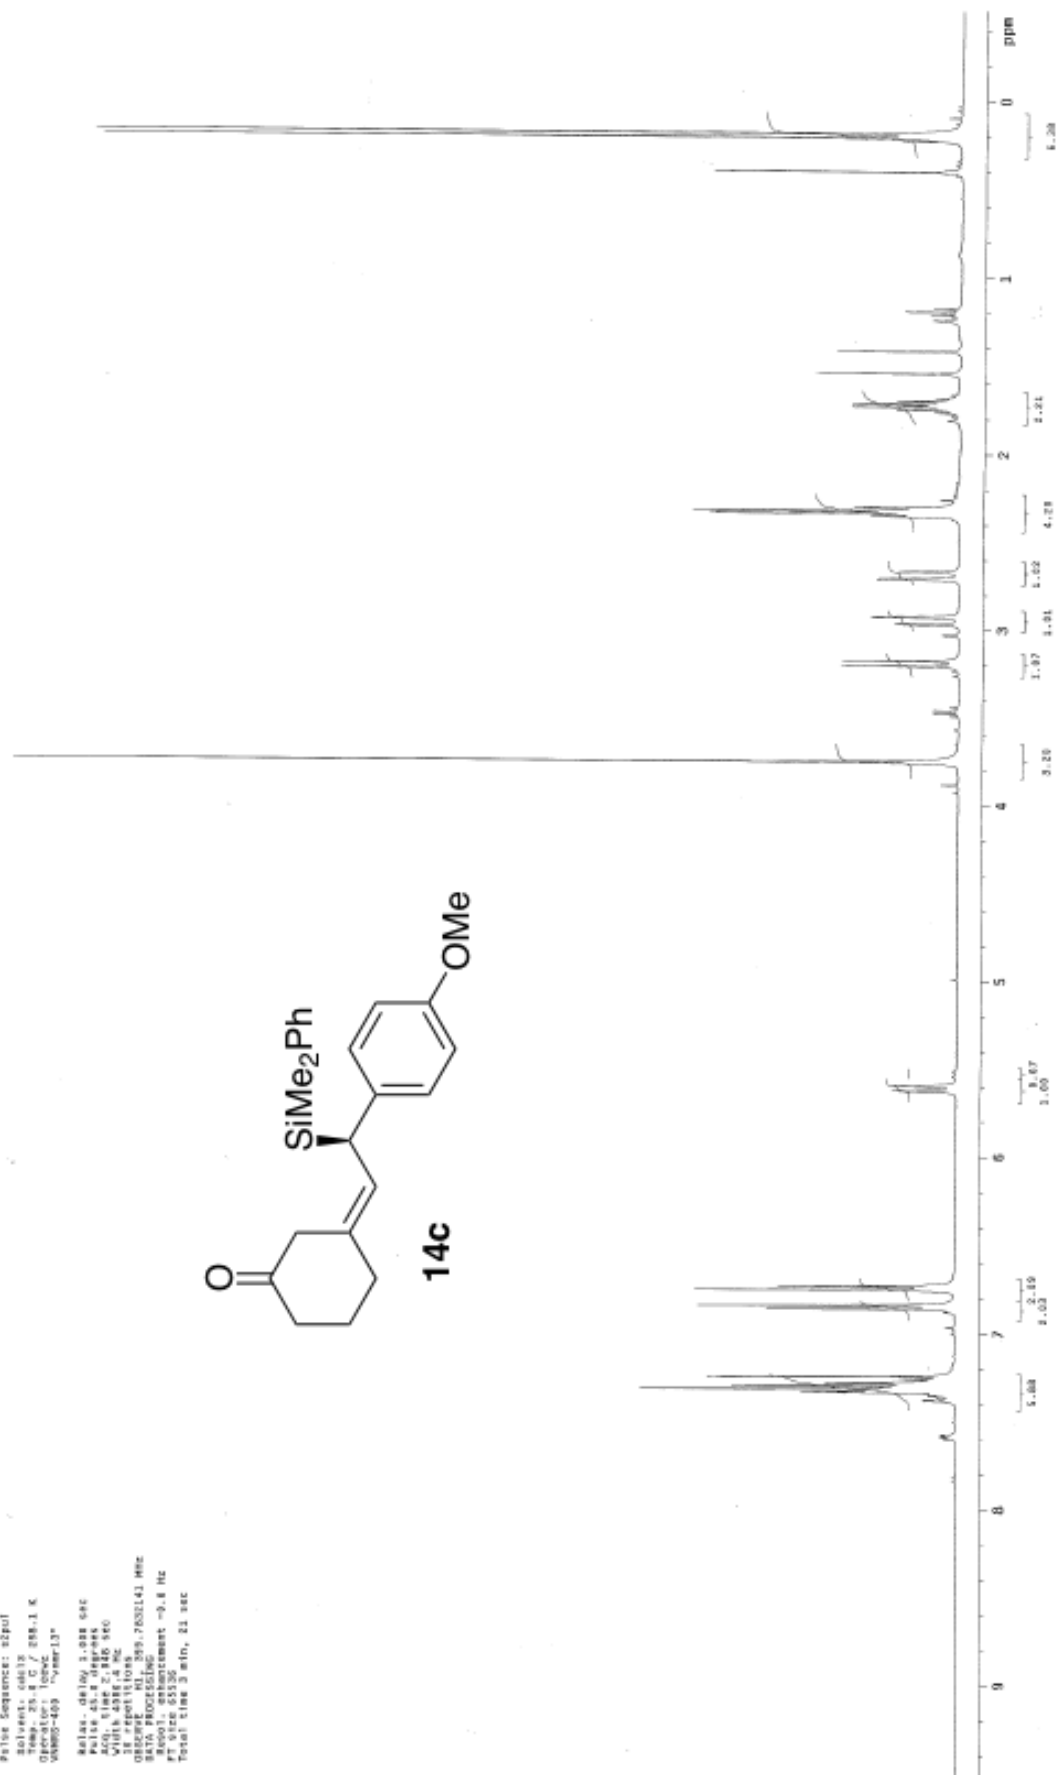

Sample: KL-1X-279-2H  
 F116: 009  
 Pulse sequence: zgpg30

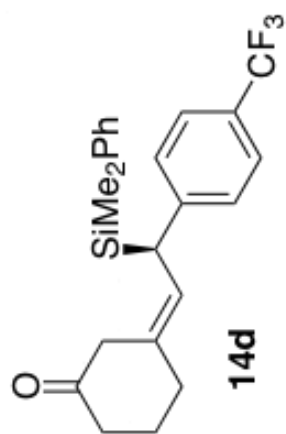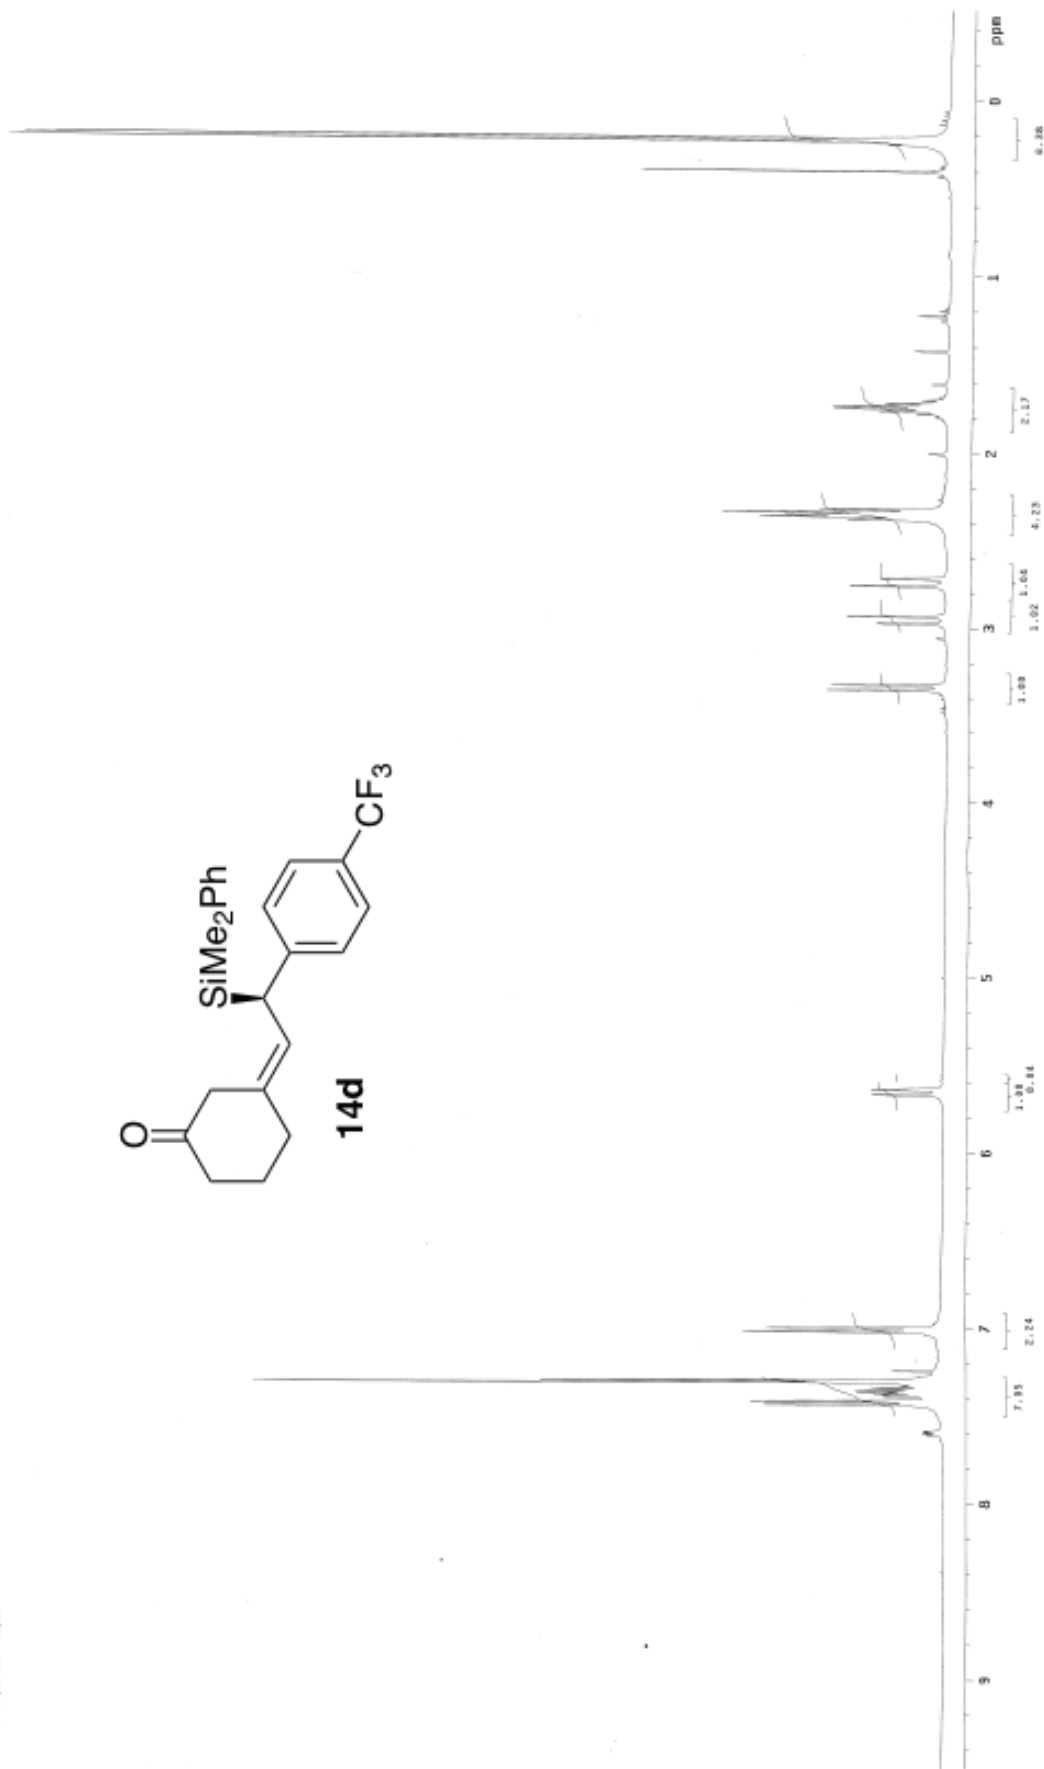

Sample: KL-IX-235-A-1H  
 File: exp

Pulse Sequence: zgpg3

Solvent: CDCl3  
 Temp: 25.0 C / 298.1 K  
 QPCPC001 "qpcpc"  
 VPR03-001 "vpr03"

Relax. delay: 1.000 sec  
 Acq. time: 21.847 sec  
 ACH time: 2.847 sec  
 VPR03: 4800.0 MHz  
 24 repetitions  
 OBSERVE: H1, 399.7832101 MHz  
 DATA PROCESSING  
 Rec01 - Enhancement -8.0 Hz  
 FT size: 65538  
 Total time: 3 min, 21 sec

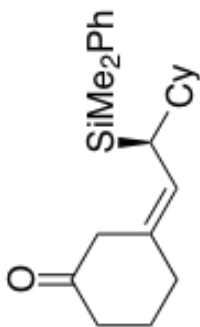

15

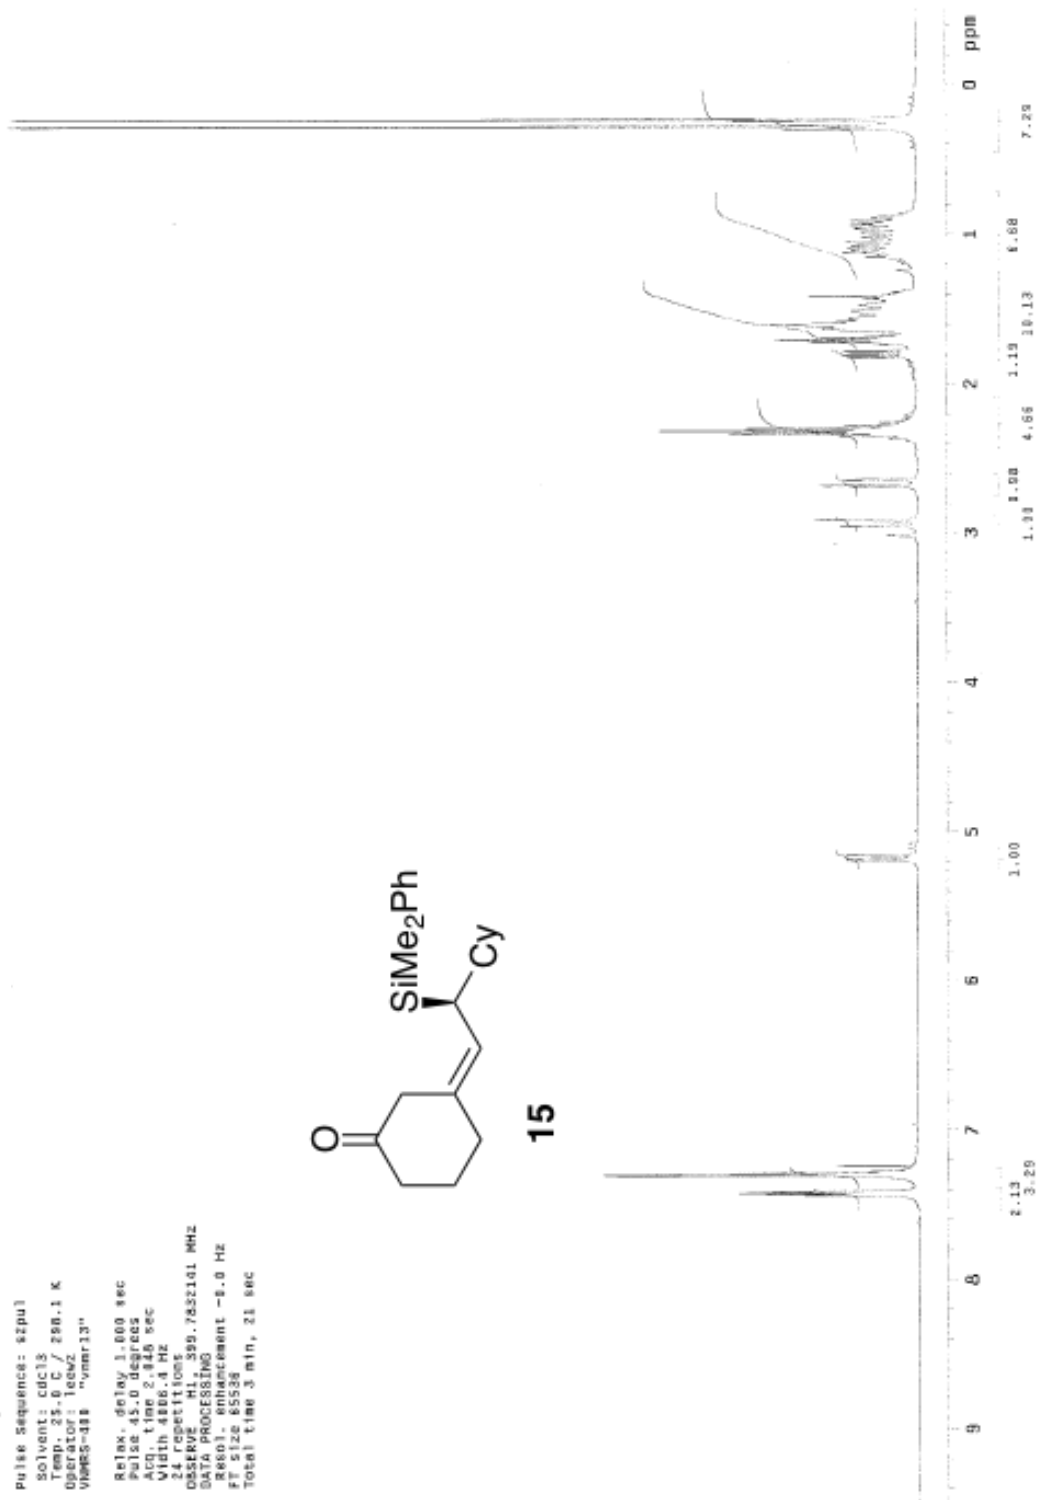

Sample: XL-10-139-1H  
 File: e09  
 Pulse Sequence: zgpg30  
 Solvent: cdcl3  
 Temp: 25.1 C / 235.1 K  
 Operator: tomve  
 Date\_09: 09/13/13  
 Rollax: delay 1.000 sec  
 Pulse: 45.1 degrees  
 Width: 18.2140 sec  
 Width: 18.2140 sec  
 24 repetitions  
 DVT: 0.00000000  
 DVT2: 0.00000000  
 Rec1: enhancement -3.5 Hz  
 FT size: 65536  
 Total time: 2 min, 21 sec

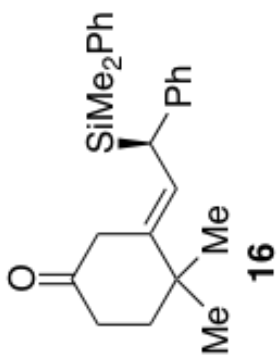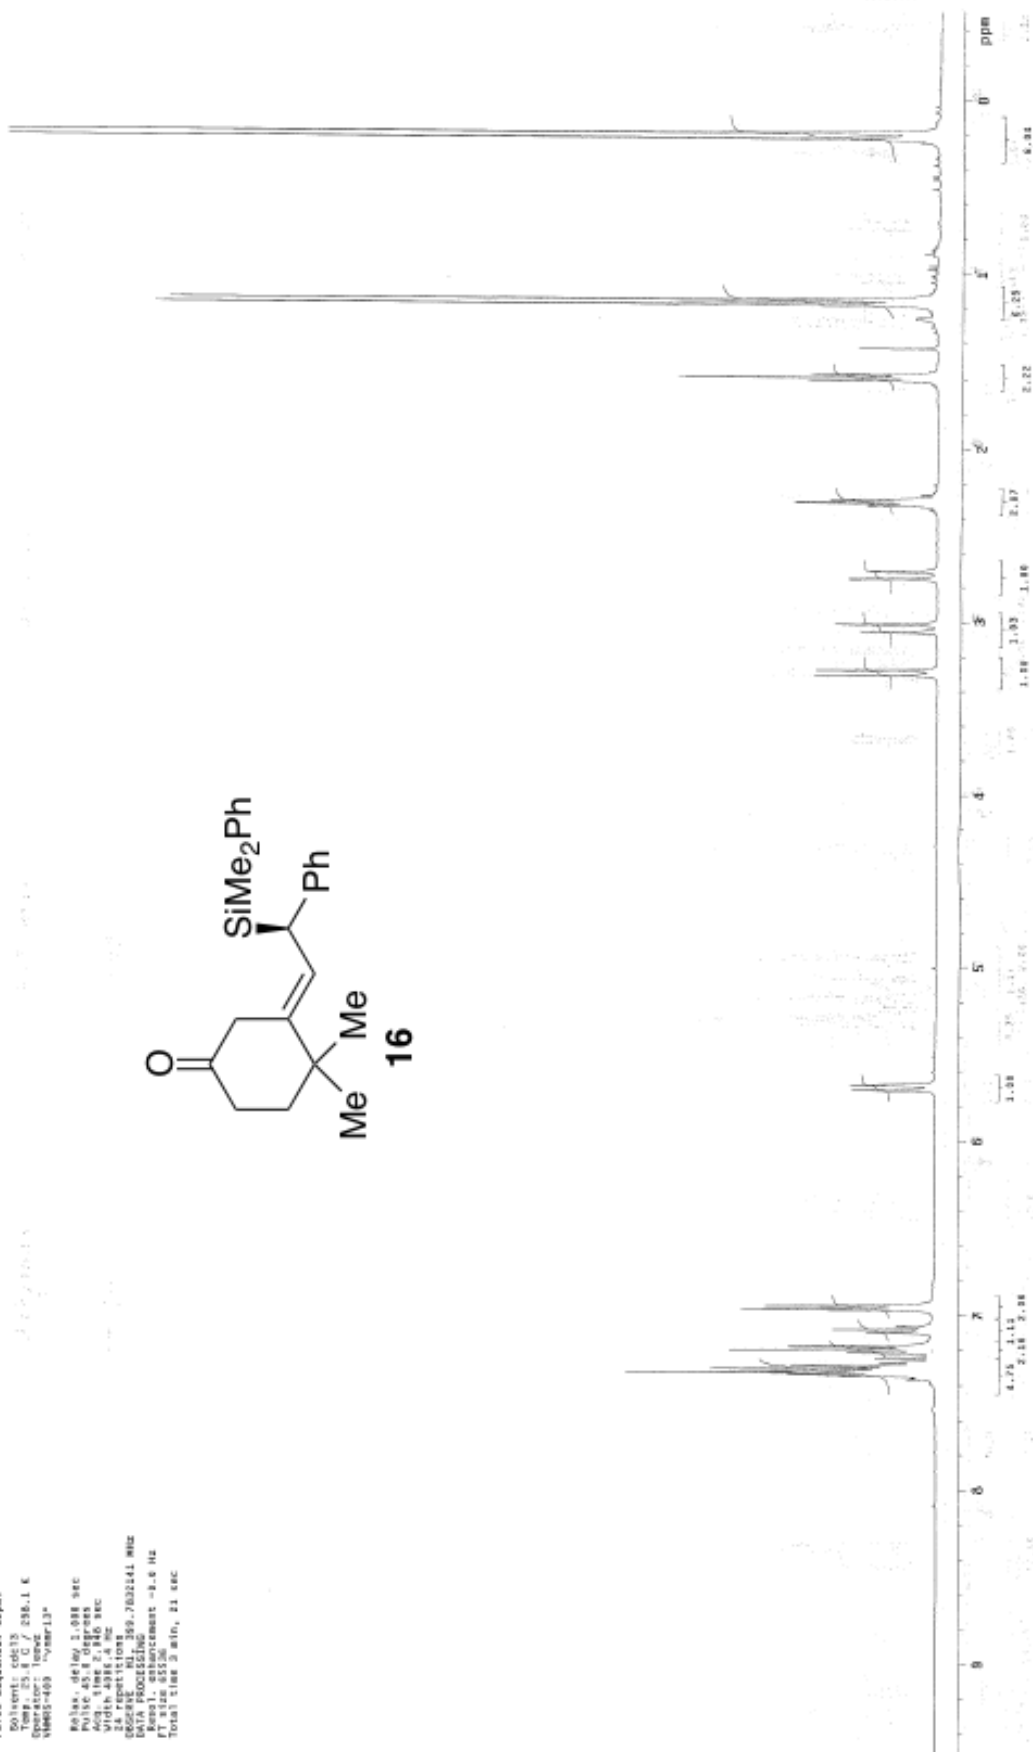

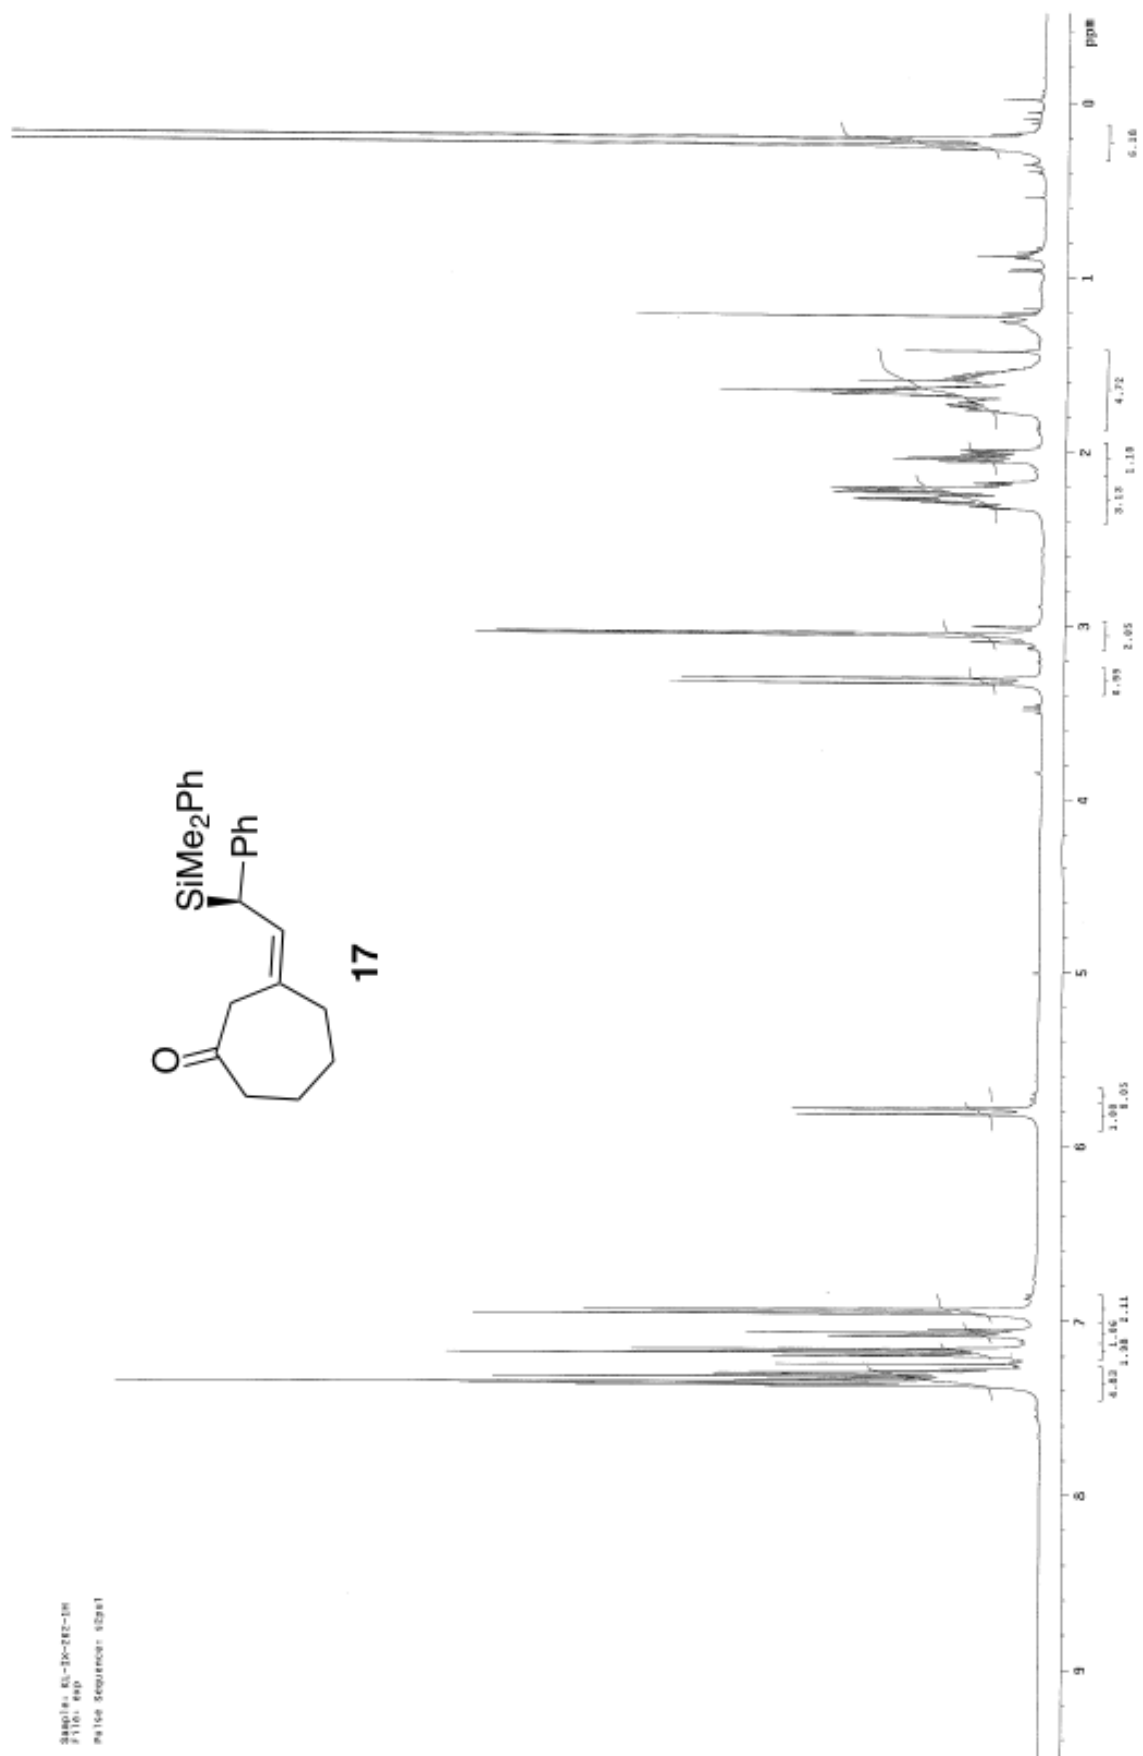

004017\_01-10-102-01  
 2100\_000  
 pulse Sequence: zgpg1

Glycosylation of phthalimide substrate, flash  
mixed fractions

Sample: HV-1-193  
F110: exp

Pulse Sequence: e2pu1

Solvent: cdcl3  
Temp: 25.0 C / 298.1 K  
Operator: dmh  
VME5-586 "hmr15"

Relax. delay 1.000 sec  
Pulse 45.0 degrees  
Acq. time 2.13 sec  
Vprh 600.132 Hz  
24 repetitions  
OBSERVE HI 499.8853621 MHz  
DATA PROCESSING  
Resol. enhancement -6.0 Hz  
FT size 65536  
Total time 3 min, 21 sec

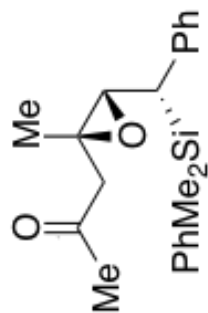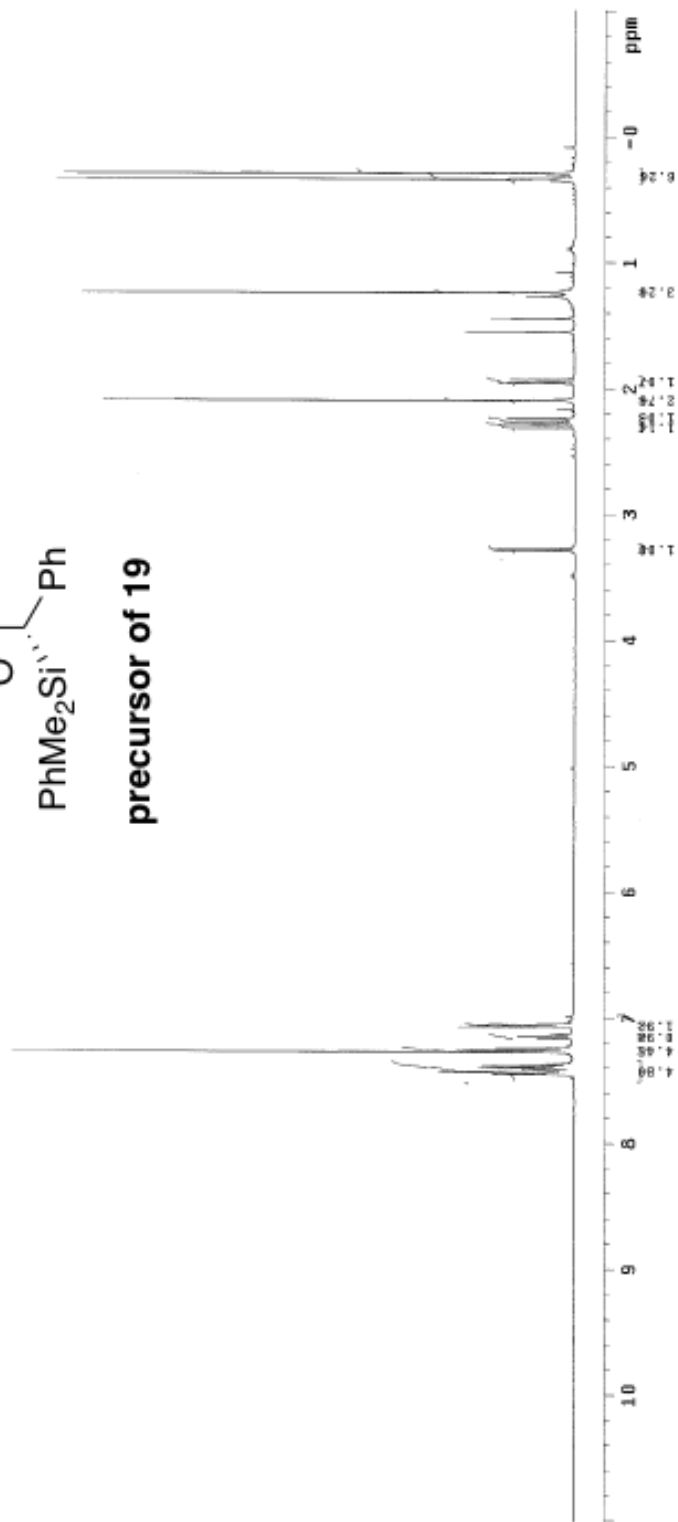

Sample: M4-I-254-4  
File: exp

Pulse Sequence: zgpg30

Solvent: cdcl3  
Temp: 25.0 C / 298.1 K  
Operator: whr  
VNAME: 403 "vnmr13"

Relax. delay: 1.000 sec  
Pulse: 14.0 degrees  
A1: 1.00 sec  
V1: 4887.7 Hz  
a: 10.00000000  
a repetitions: 1  
OBSERVE: H1, 399.7832141 MHz  
DATA PROCESSING  
Resol.: enhancement -8.0 Hz  
FT size: 65536  
Total time: 3 min, 21 sec

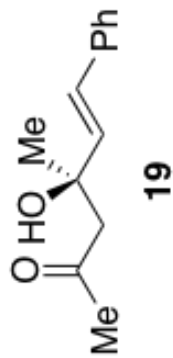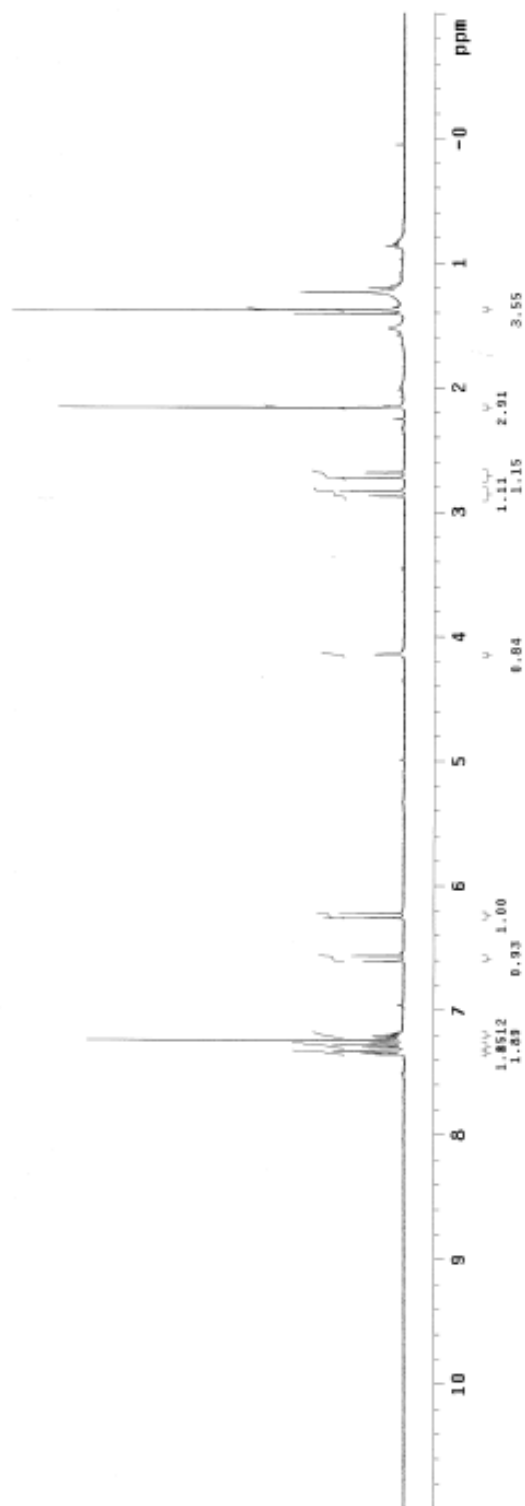

Sample: 30-C-460  
 F1: 60p  
 Pulse Sequence: zgpg30  
 Solvent: CDCl3  
 Concentration: 200.1 mg / 200.1 µl  
 Operator: mhr / 200.1 µl  
 VPROB: zgpg30 "zgpg30"  
 RNAME: 30p\_1\_180 SEC  
 PULSE: 45.0 µsec  
 ACQ: 45.0 µsec  
 AQC: 45.0 µsec  
 30 sec  
 30 sec  
 OBSERVE: 1H, 200.132261 MHz  
 PULPROG: zgpg30  
 FT SIZE: 65536  
 TOTAL TIME: 3.010, 21.000

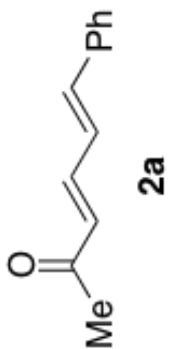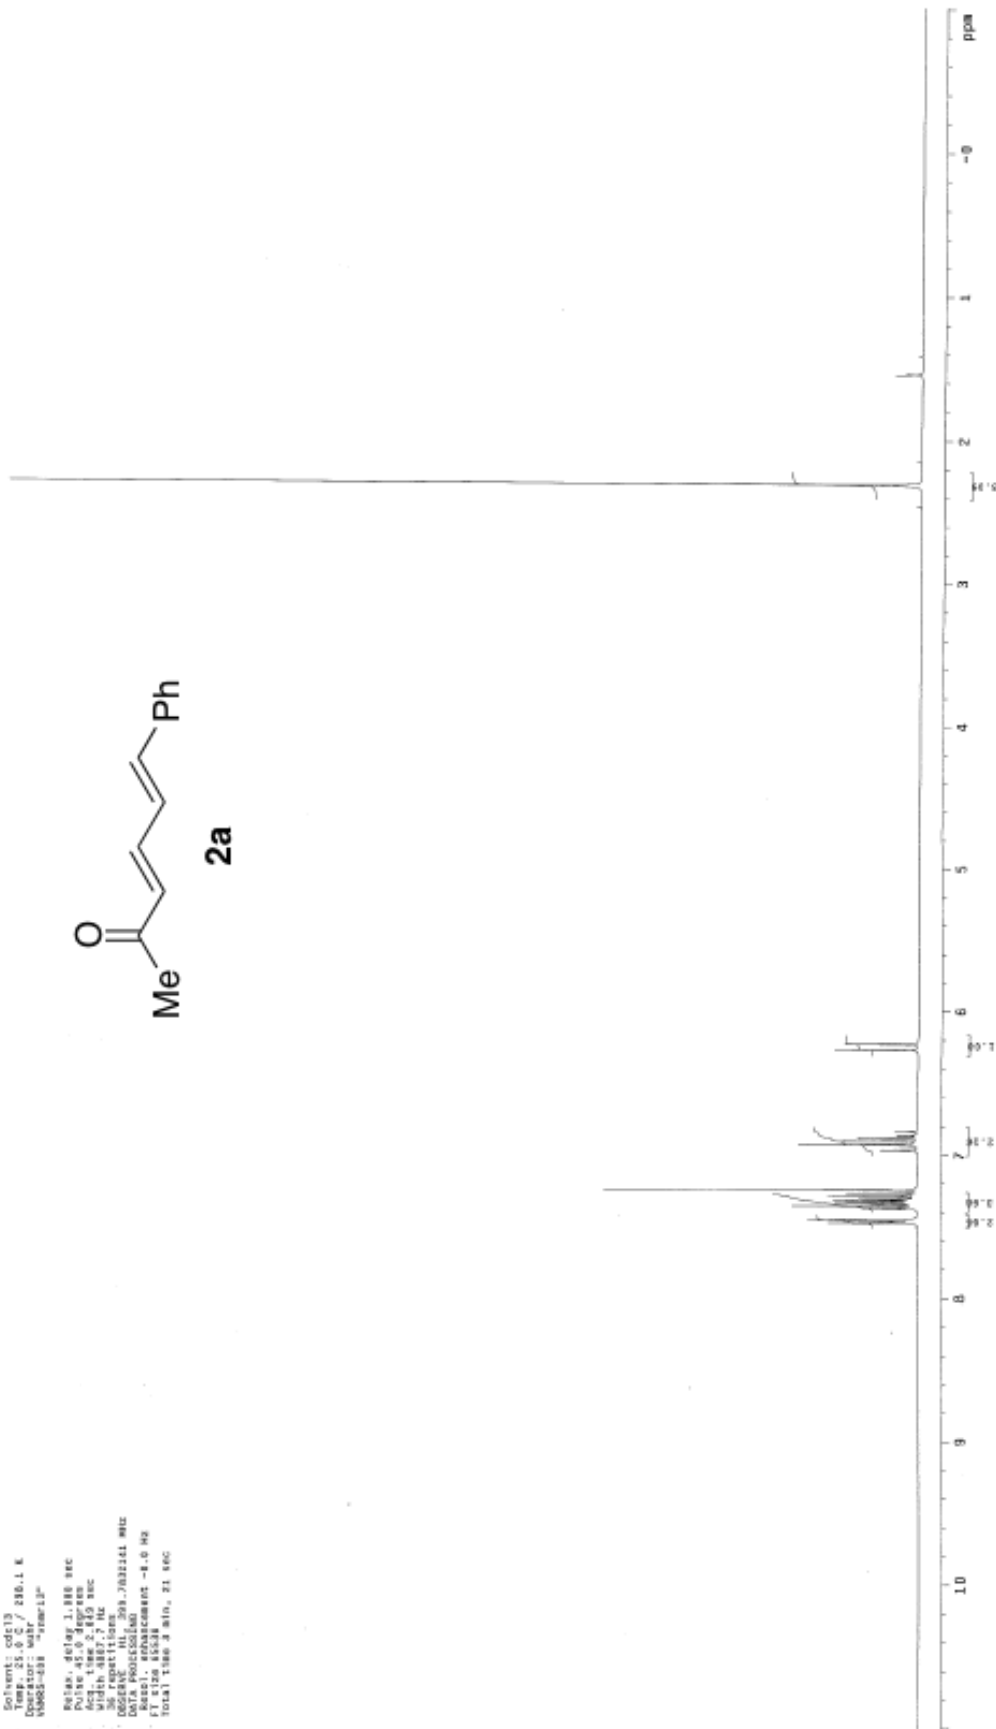



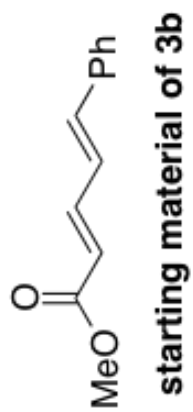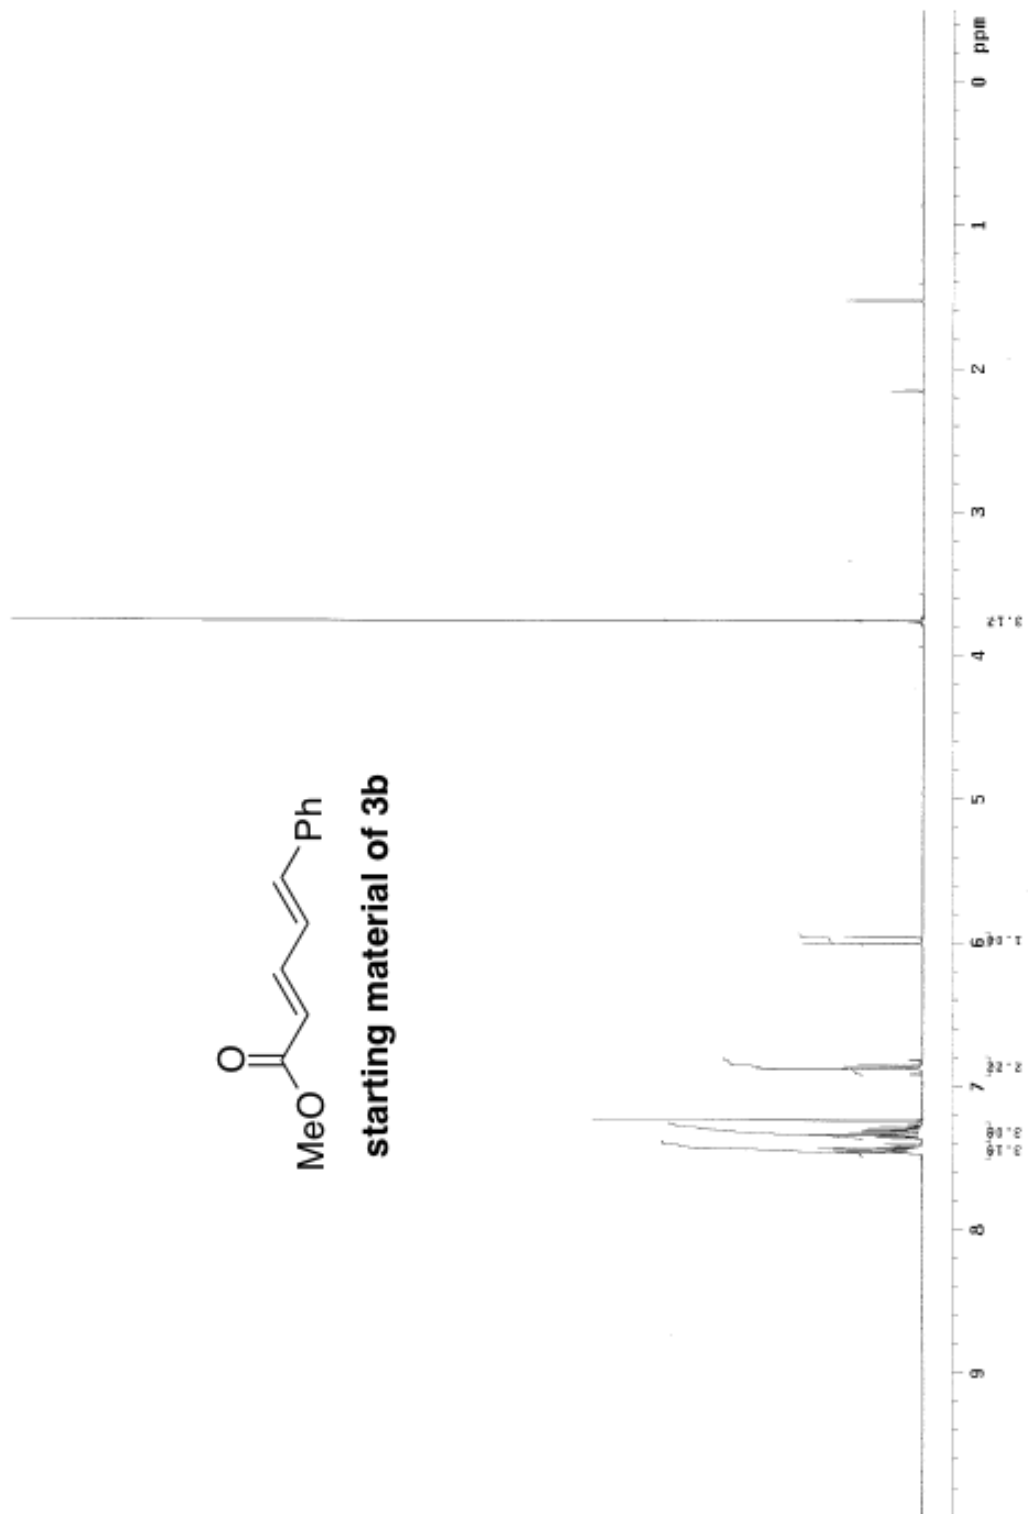

Sample: MW-3-158  
File: exp

Pulse Sequence: zgpg30

Solvent: cdcl3  
Temp: 24.8 C / 297.1 K  
Operator: wuhr  
VIMS-400 "vnmr3"

Relax. delay 1.000 sec  
Pulpc 45.0 degrees  
Acq time 0.093 sec  
Fwhm 4807.7 Hz  
Sb repetitions  
OBSERVE H1 393.7832141 MHz  
DATA PROCESSING  
Resol. enhancement -0.0 Hz  
FT size 65336  
Total time 3 min, 21 sec

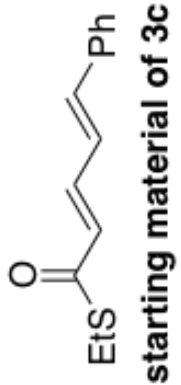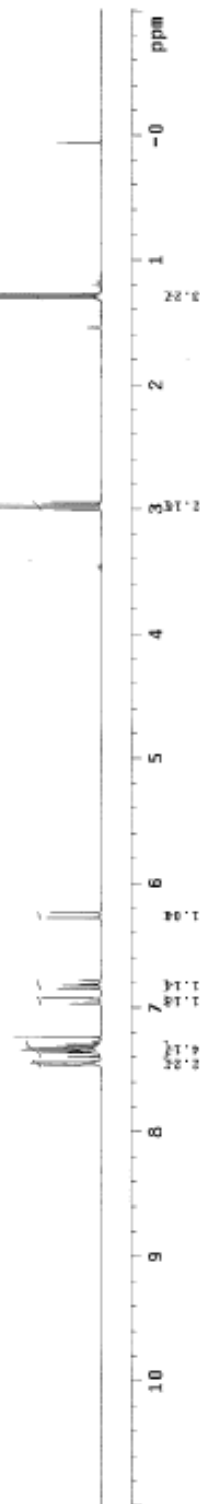

QM015\_01\_20-010-04-1H  
 F100\_700e0085\chem\015\DATA\FILE\REL-120-102-04-1H\_1.H  
 Pulse sequence: zgpg30  
 Solvent: CDCl3  
 Temperature: 298.1 K  
 Operator: tomw  
 File: 01-10-010-04-1H  
 Name: 01-10-010-04-1H  
 Relax. delay: 1.000 sec  
 Pulse: 45.0 degrees  
 ACQ. time: 7.916 sec  
 F2: 100.626 MHz  
 14 repetitions  
 OBSERVED: 01\_10-010-04-1H\_7801013.MHZ  
 Name: 01-10-010-04-1H\_7801013.MHZ  
 PC step: 01020  
 Total time: 5 min, 21 sec

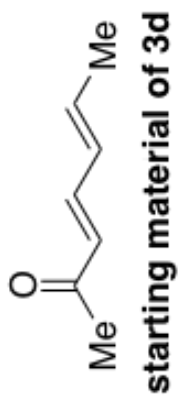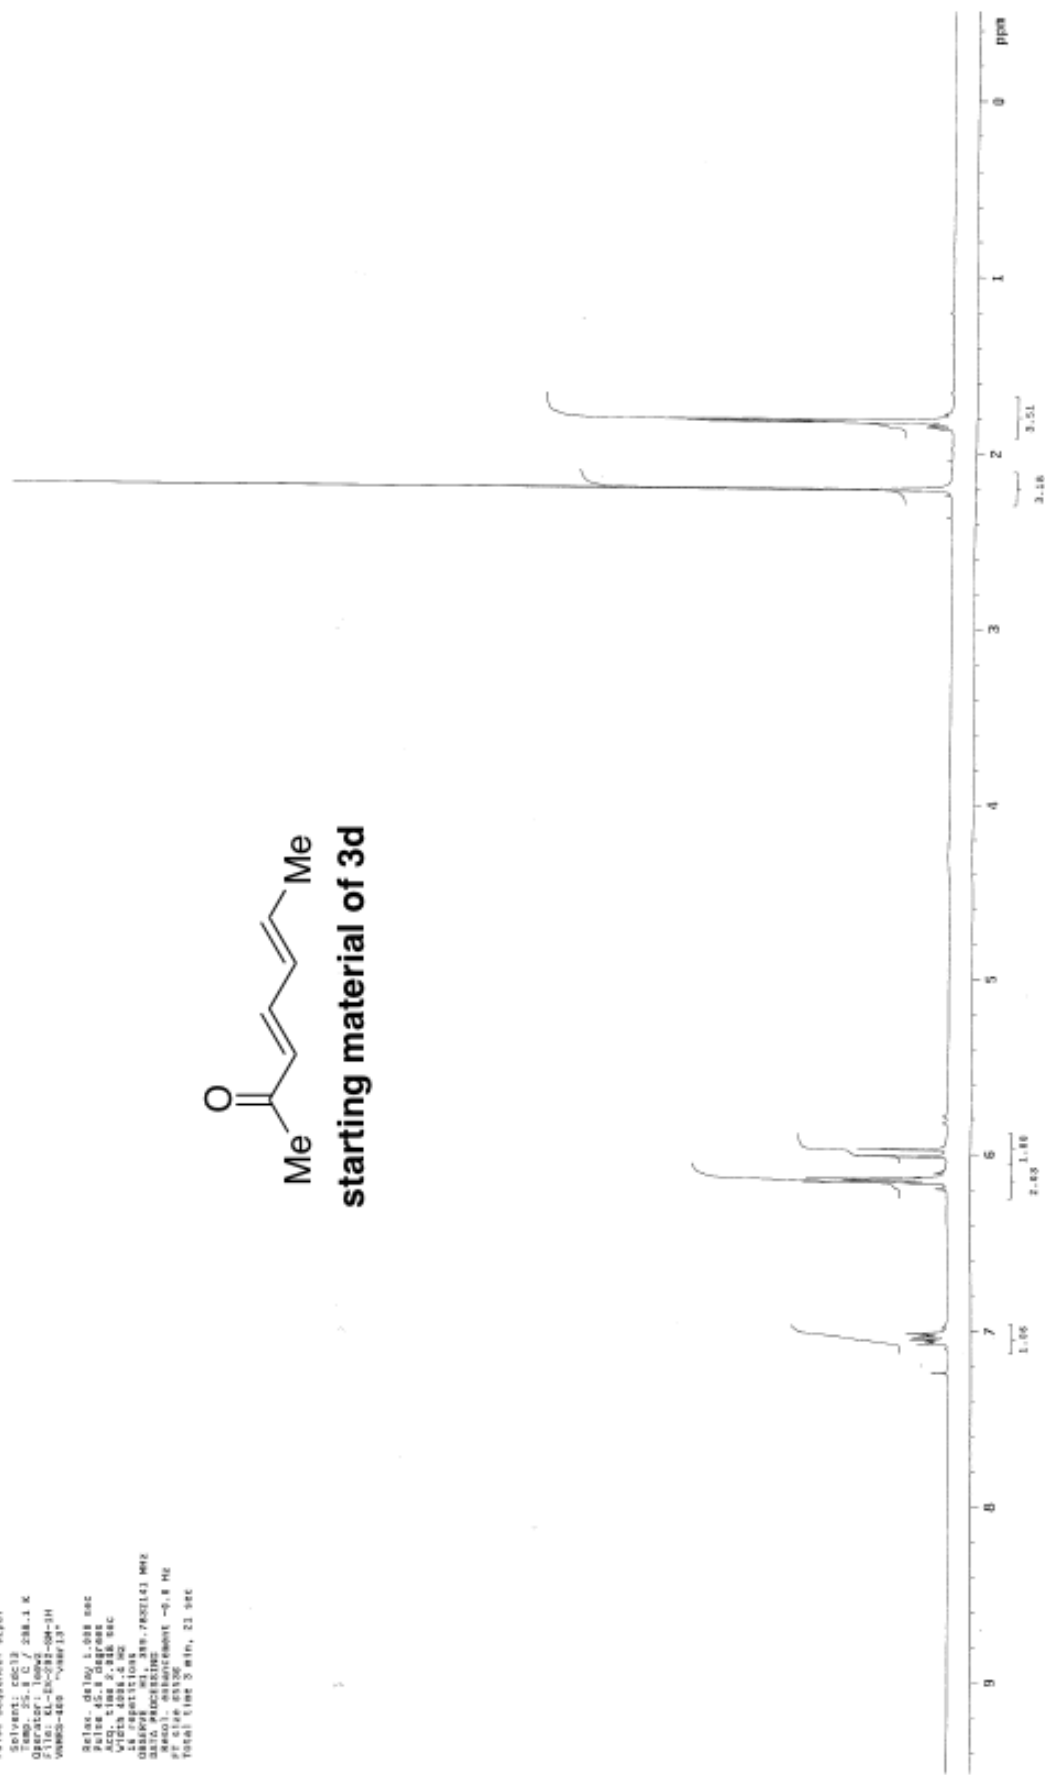

Sample: MW-1-088-04-12-2018  
 File: exp

Pulse Sequence: zgpg30

Solvent: cdcl3  
 Temp: 25.8 C / 289.1 K  
 Operator: vubr  
 VHMSS-400 "vnmr13"

Relax. delay: 1.000 sec  
 Pulse: 45.0 degrees  
 Width: 2.000 sec  
 Width: 400.7 MHz  
 24 repetitions  
 OBSERVE H1, 399.783241 MHz  
 DATA PROCESSING  
 Resol.: enhancement -9.6 Hz  
 FT size: 65236  
 Total time: 3 min, 21 sec

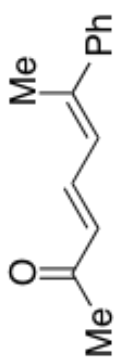

starting material of 3e

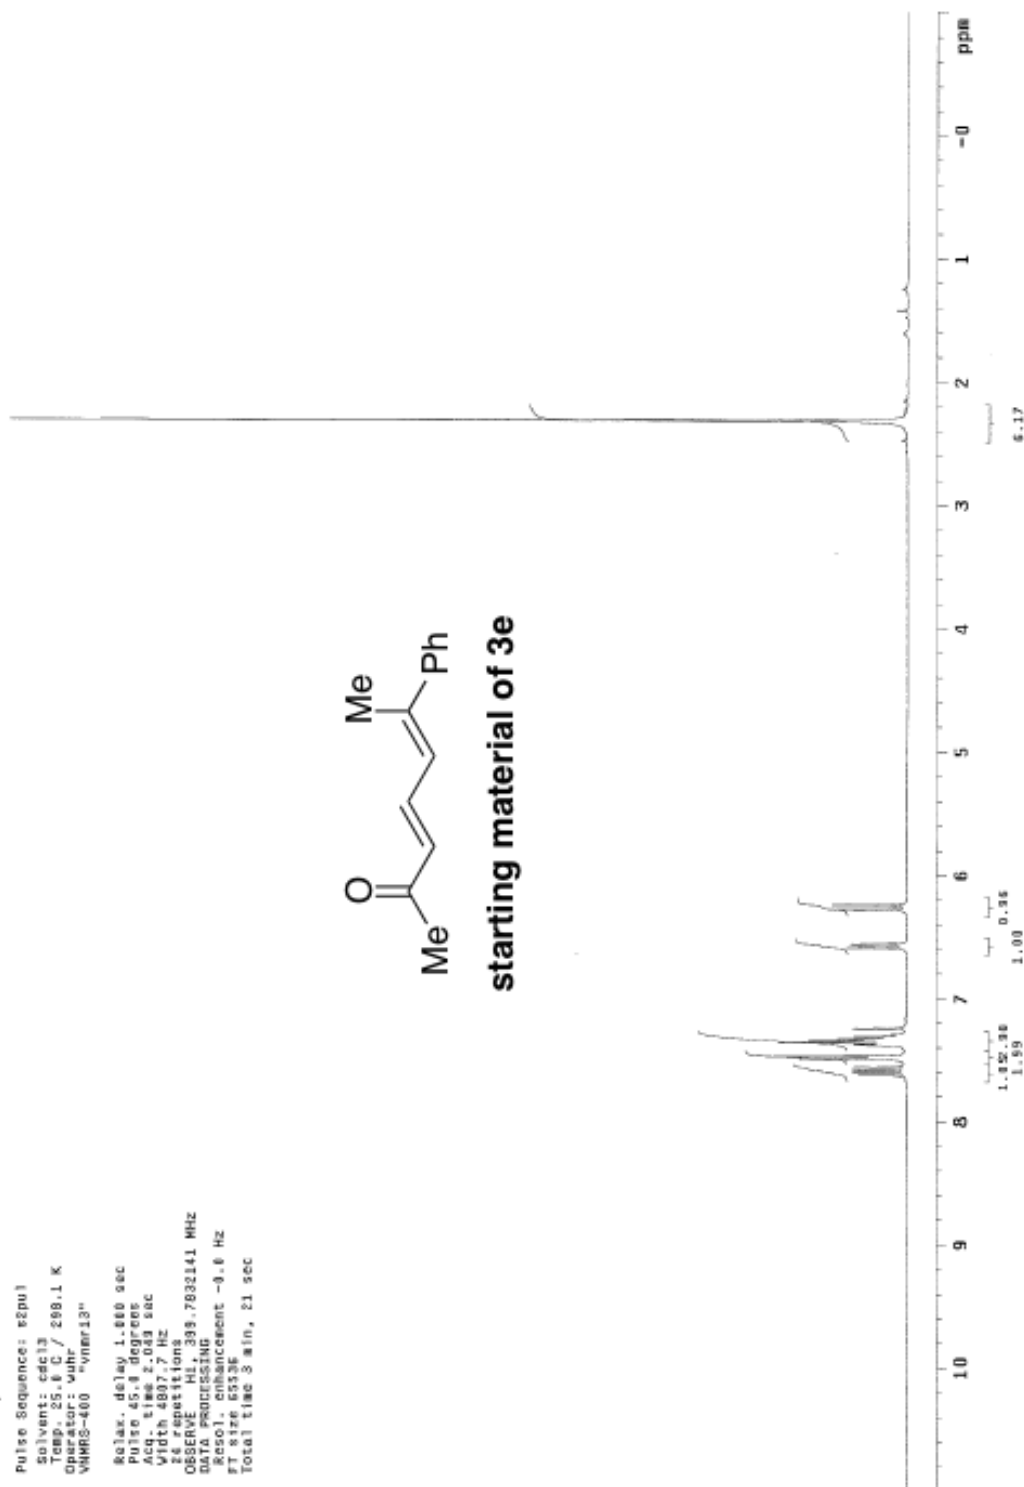

Sample: M0-I-065-3-04-22-2010  
 File: /home/ahn/vnmr32/data/haokku/M0-I-065-3H.fid

Pulse Sequence: s2pul

Solvent: cdcl3  
 Temp: 25.0 C / 298.1 K  
 Operator: s2pul  
 Date: 01-25-10  
 VNMRS-400 "VNMRS13"

Relax. delay 1.000 sec  
 Pulse 45.0 degrees  
 Width 4807.7 Hz  
 24 repetitions

OBSERVE H1 399.7832141 MHz  
 DATA PROCESSING  
 Resol. enhancement -0.0 Hz  
 FT size 65536  
 Total time 3 min, 21 sec

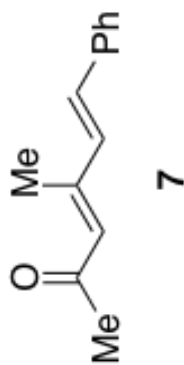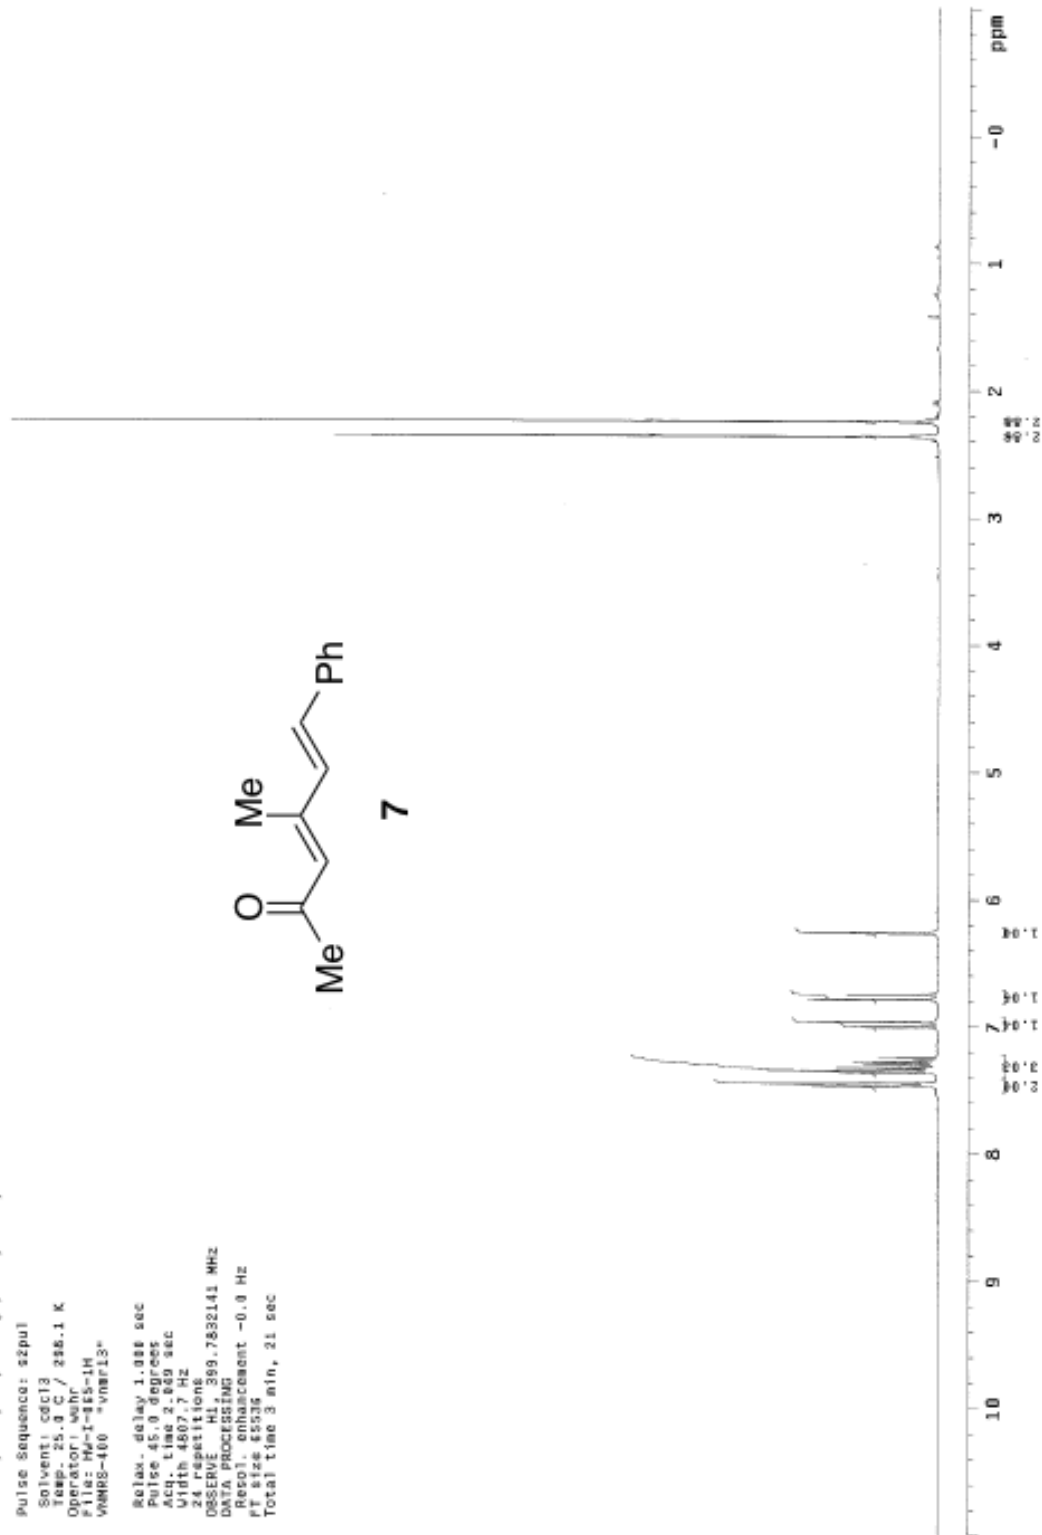

Sample: MW-1-121-2-05-21-2010  
 File: exp

Pulse Sequence: zgpg30

Solvent: cdcl3  
 Temp: 25.0 C / 298.1 K  
 Operator: wuhr  
 VNMRS-600 vnmr13"

Relax. delay 1.000 sec  
 Pulse 45.0 degrees  
 Acq. time 2.009 sec  
 FID 4807.7 Hz  
 OBSERVED F1 F2 399.7832141 MHz  
 DATA PROCESSING  
 Resol. enhancement -0.0 Hz  
 FT size 65536  
 Total time 3 min, 21 sec

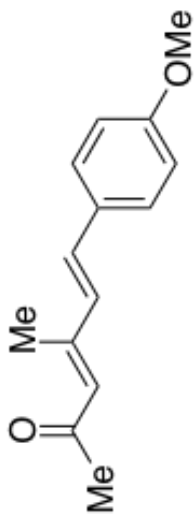

starting material of 8b

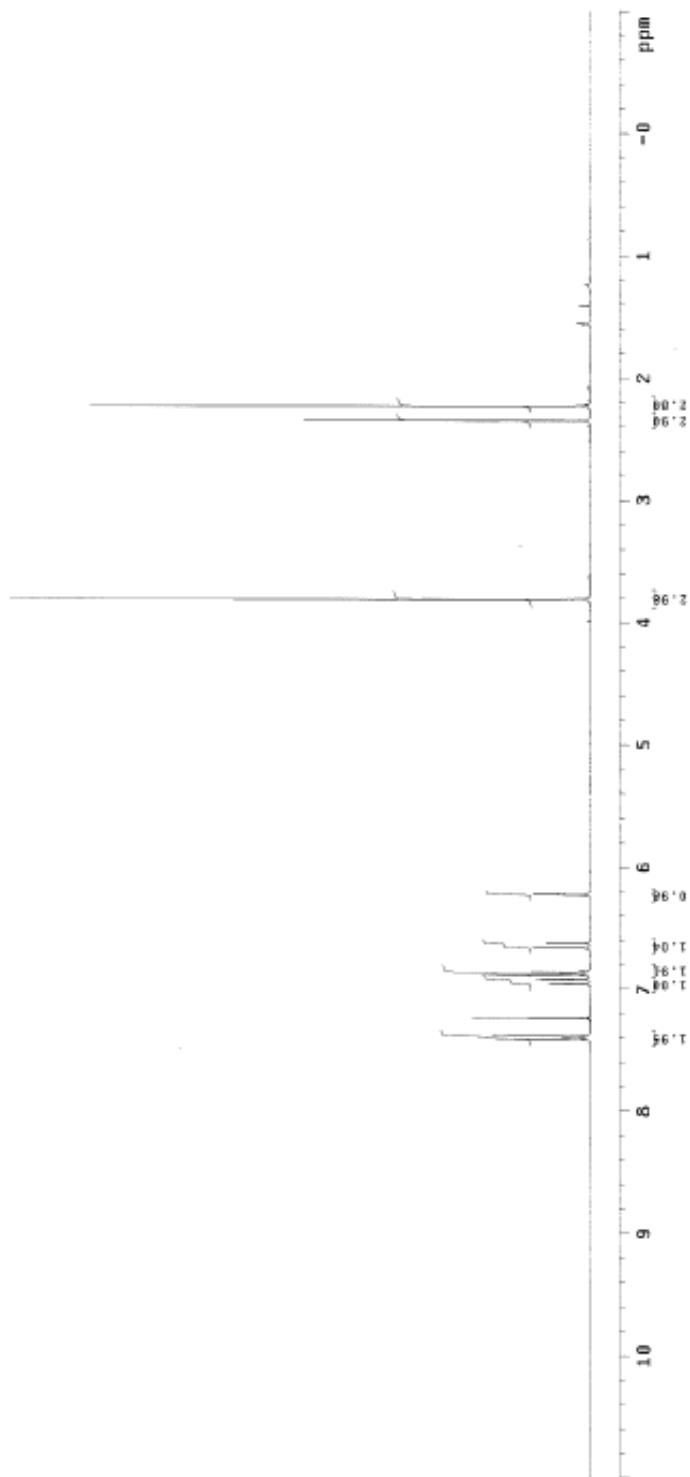

Sample: MW-1-112-2  
 F1ID: /home/ahh/vmerys/data/haobu/MW-1-112-1H.fid

Pulse Sequence: zgpg30

Solvent: cdcl3  
 Temp: 25.0 C / 298.1 K  
 Date\_UTC: 20130710 11:05:11  
 File: MW-1-112-1H  
 VNAME: 160 - vmr13\*

Relax. delay: 1.000 sec  
 Pulse: 45.0 degrees  
 Acq. time: 2.669 sec  
 Width: 4807.7 Hz  
 ZF repetitions: 24  
 OBSERVE H1: 393.7932335 MHz  
 DATA PROCESSING  
 Resol. enhancement: -0.0 Hz  
 FT size: 65536  
 Total time: 3 min, 21 sec

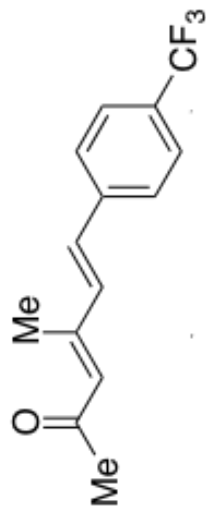

starting material of 8c

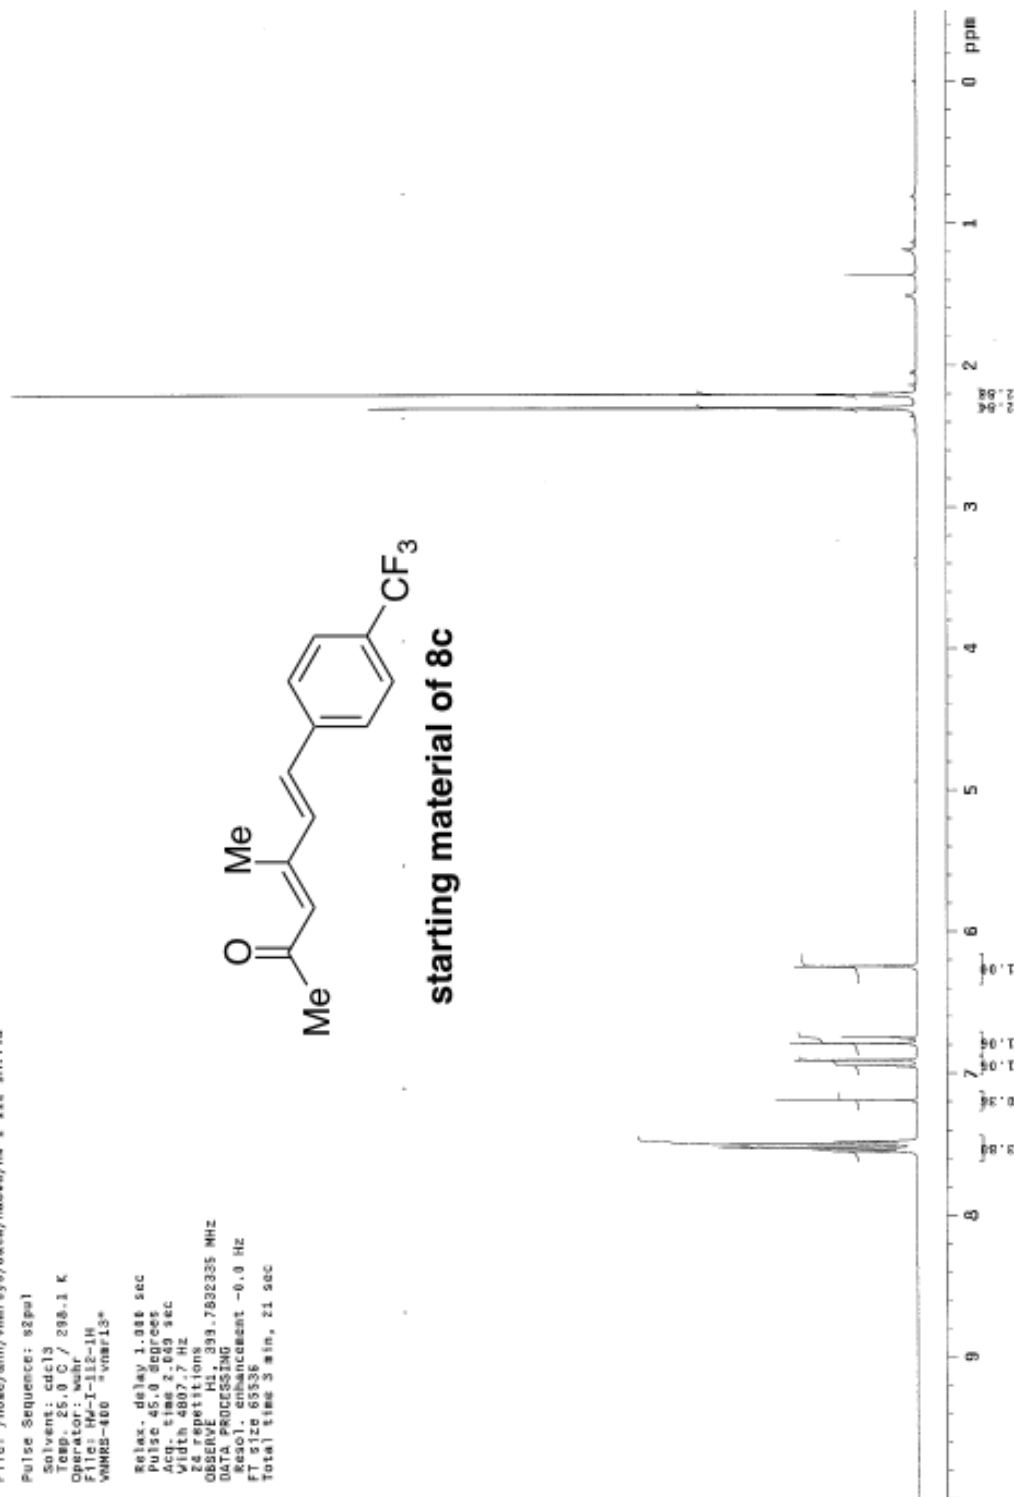

Sample: IN-1-133-2  
 File: exp  
 Pulse Sequence: zgpg30  
 Solvent: CDCl3  
 Temp: 25.3 C / 298.1 K  
 Operator: wjhr  
 VNAME: 400 -vnmr13\*  
 Relax. delay: 1.000 sec  
 Pulse: 45.000000 sec  
 Acq: 4.000000 sec  
 Width: 4807.7 Hz  
 40 repetitions  
 OBSERVE: H1, 399.7832141 MHz  
 DATA PROCESSING  
 Recor: enhancement -0.8 Hz  
 F1 size: 18536  
 Total time 3 min, 21 sec

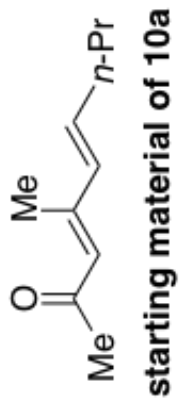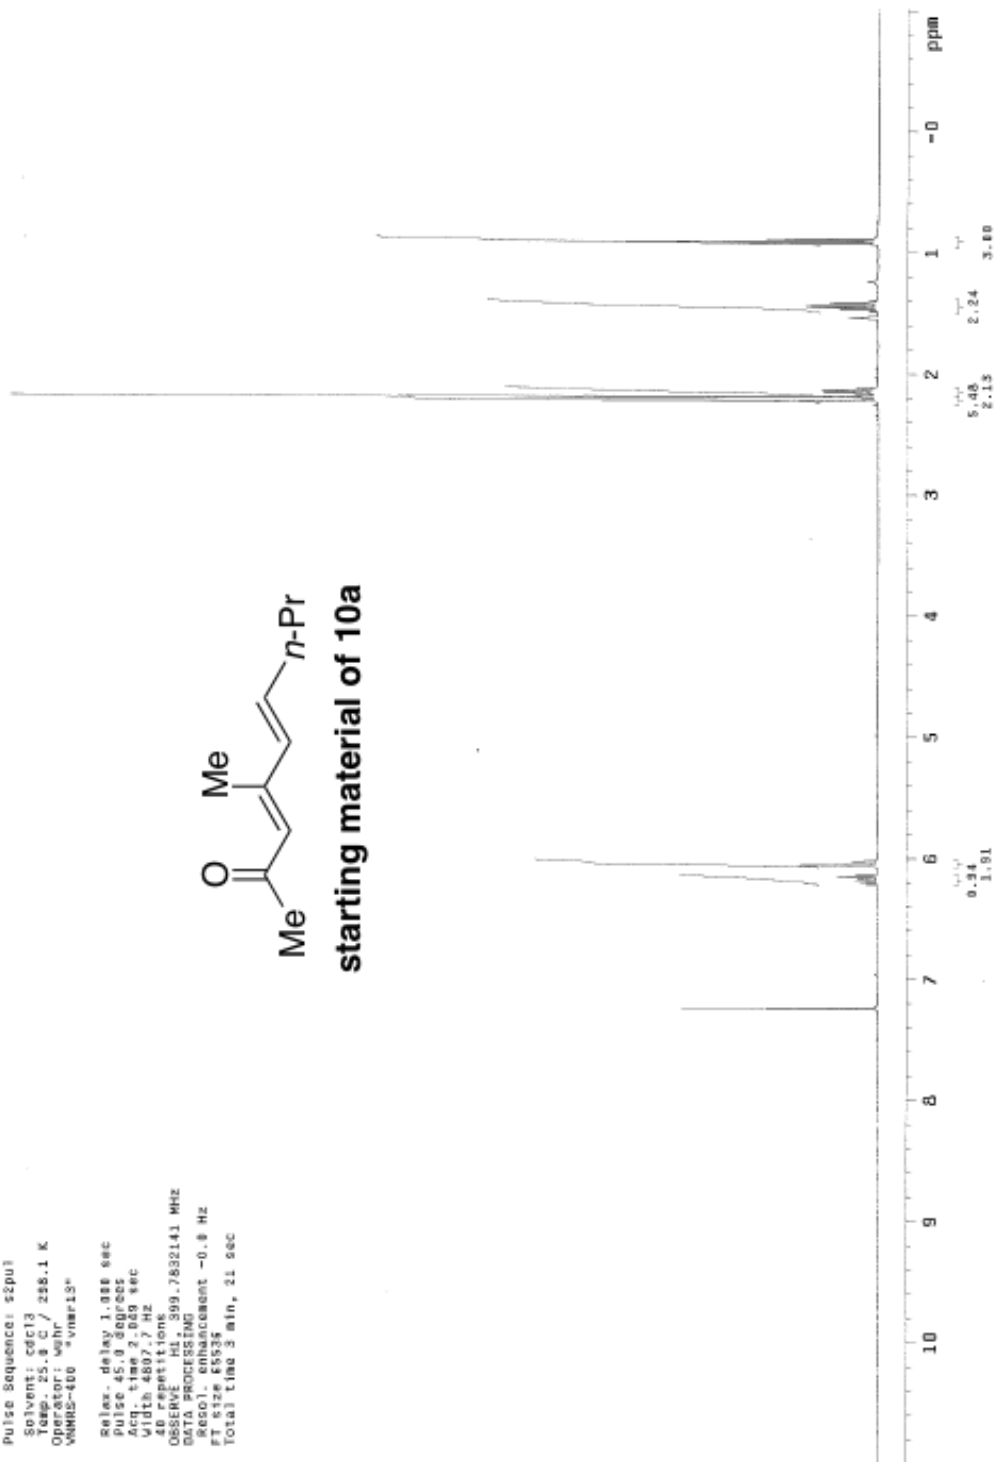





Sample: MW-1-143-1-08-23-2810  
 File: exp

Pulse Sequence: sZpu1  
 Solvent: cdcl3  
 Temp: 25.8 C / 280.1 K  
 Operator: wubr  
 VNMRS=400 "vnmr13"

Relax. delay 1.800 sec  
 Pulse 45.8 degrees  
 Acq. time 2.045 sec  
 Width 400.17 Hz  
 Spectrometer vnmr13  
 OBSERVATION: 399.7632141 MHz  
 DATA PROCESSING:  
 Resol. enhancement 0.8 Hz  
 FT size 6536  
 Total time 3 min, 21 sec

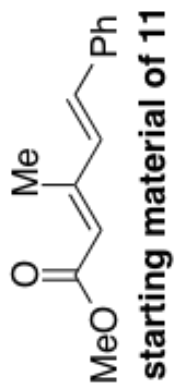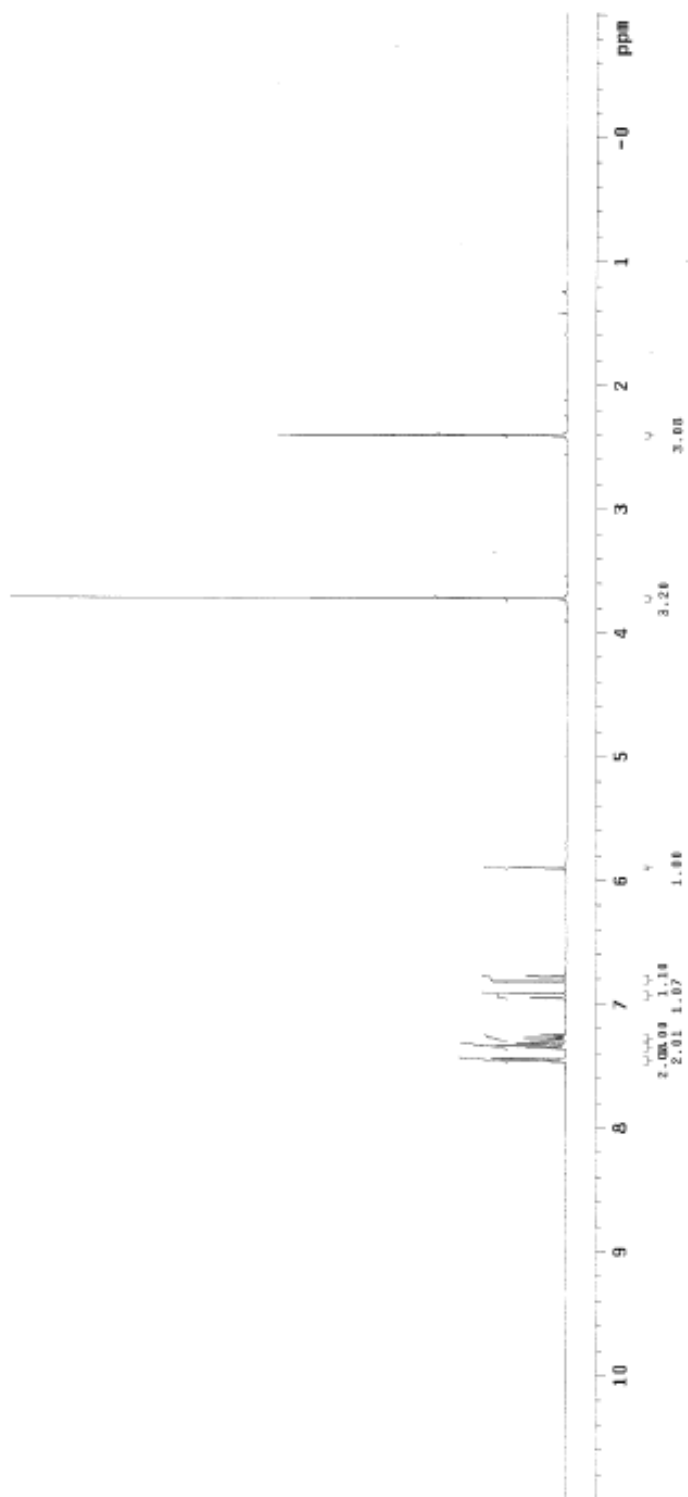

Sample: RM-1-168-2  
 File: exp  
 Pulse Sequence: s2pu1  
 Solvent: cdcl3  
 Temp: 25.0 C / 298.1 K  
 Operator: wuhr  
 VNAME: 403 "vmer13"  
 Relax. delay: 1.000 sec  
 Pulse: 45.0 degree  
 Acq. time: 2.043 sec  
 Inj. volume: 10  
 Inj. concentration:  
 OBSERVE: H1, 333.7832161 MHz  
 DATA PROCESSING  
 Resol: enhancement -1.0 Hz  
 FT size: 65536  
 Total time: 3 min, 21 sec

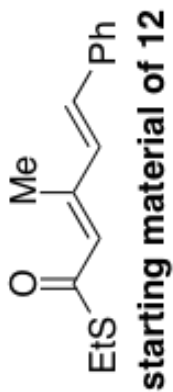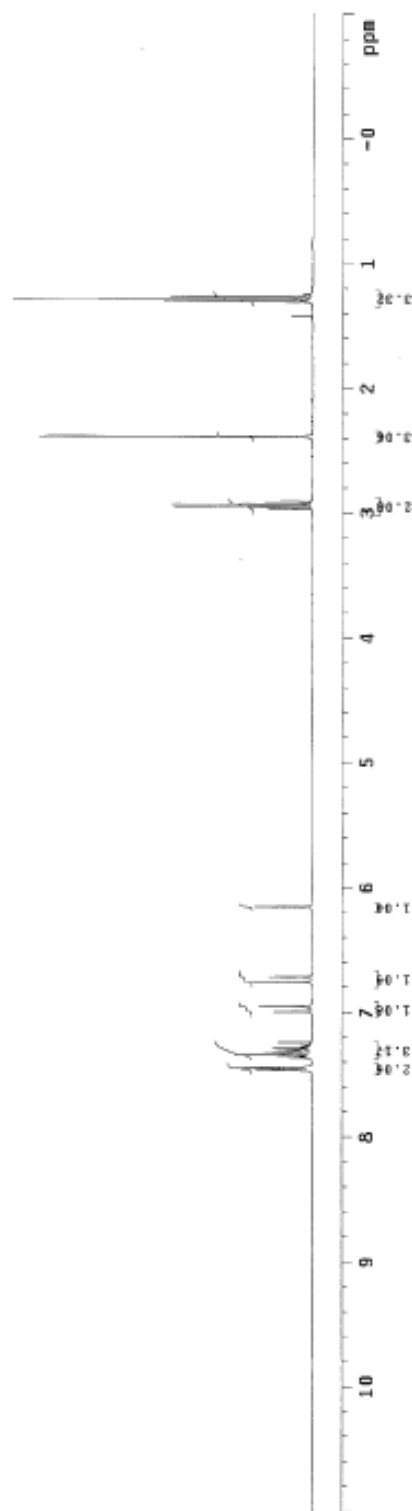

Sample: AL-DX-165-3H  
File: exg  
Pulse Sequence: zgpg30

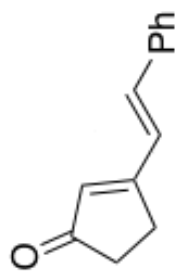

starting material of 13

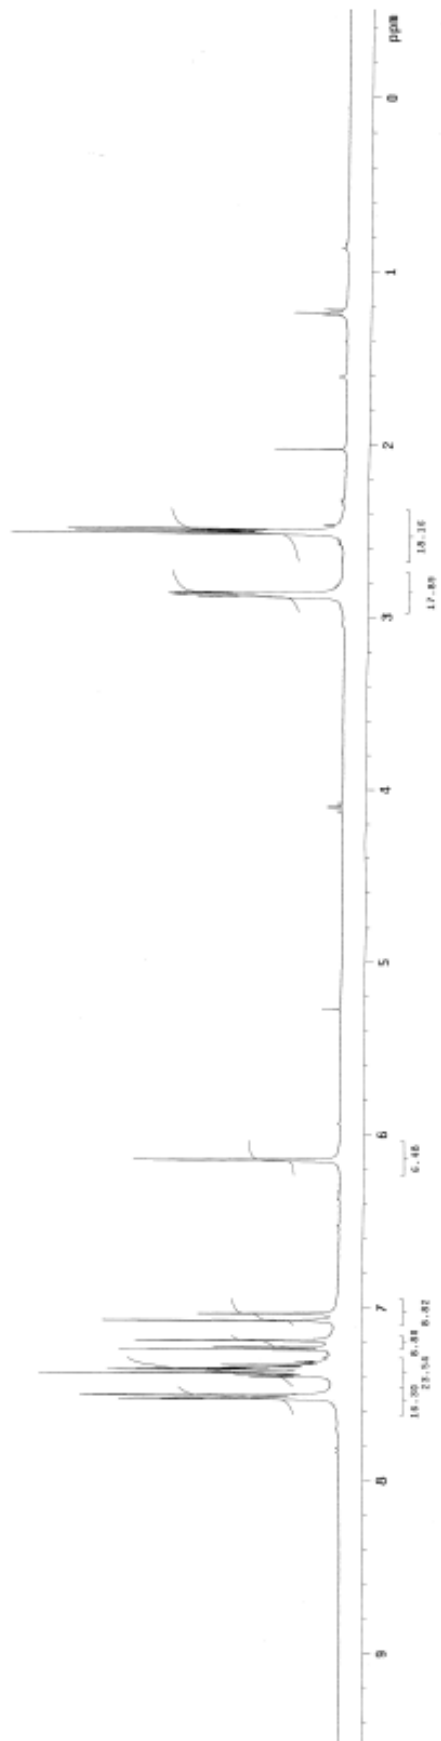



Sample: E1-D4-268-3H  
File: e02  
Pulse Sequence: zgpg30

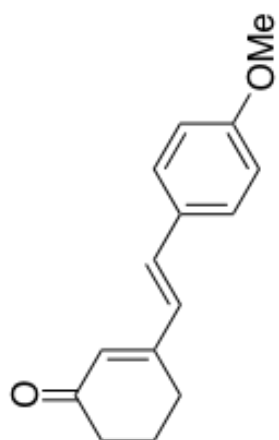

**starting material of 14c**

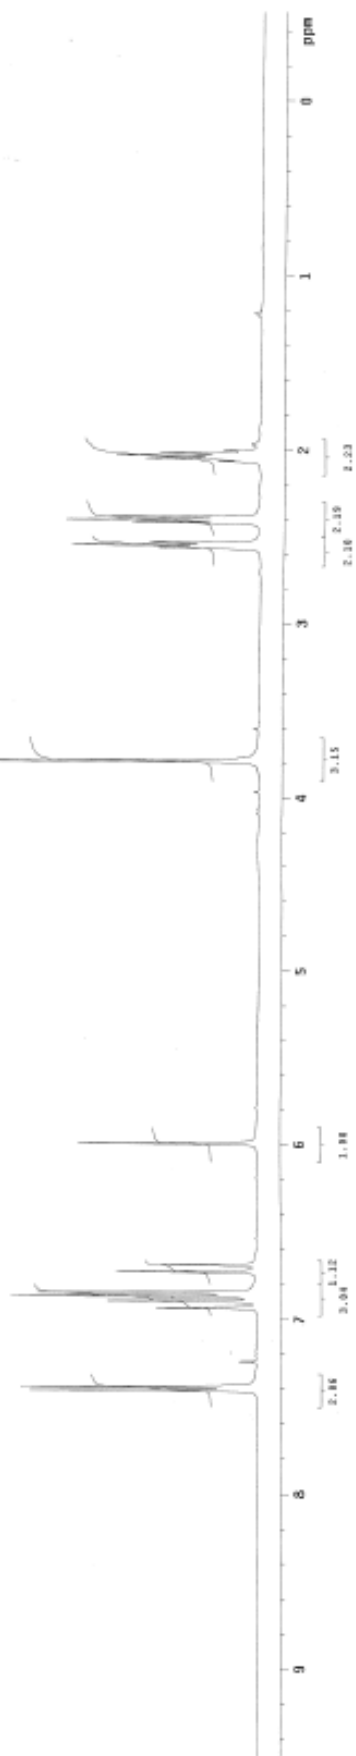

Sample: K1-Ex-269-3H  
File: exp  
Pulse Sequence: s2p01

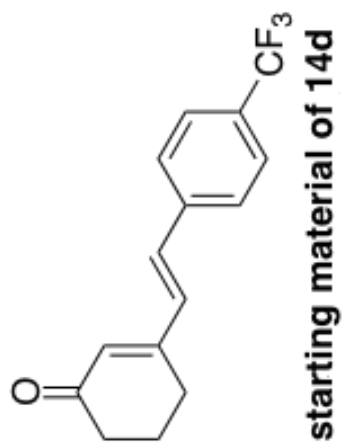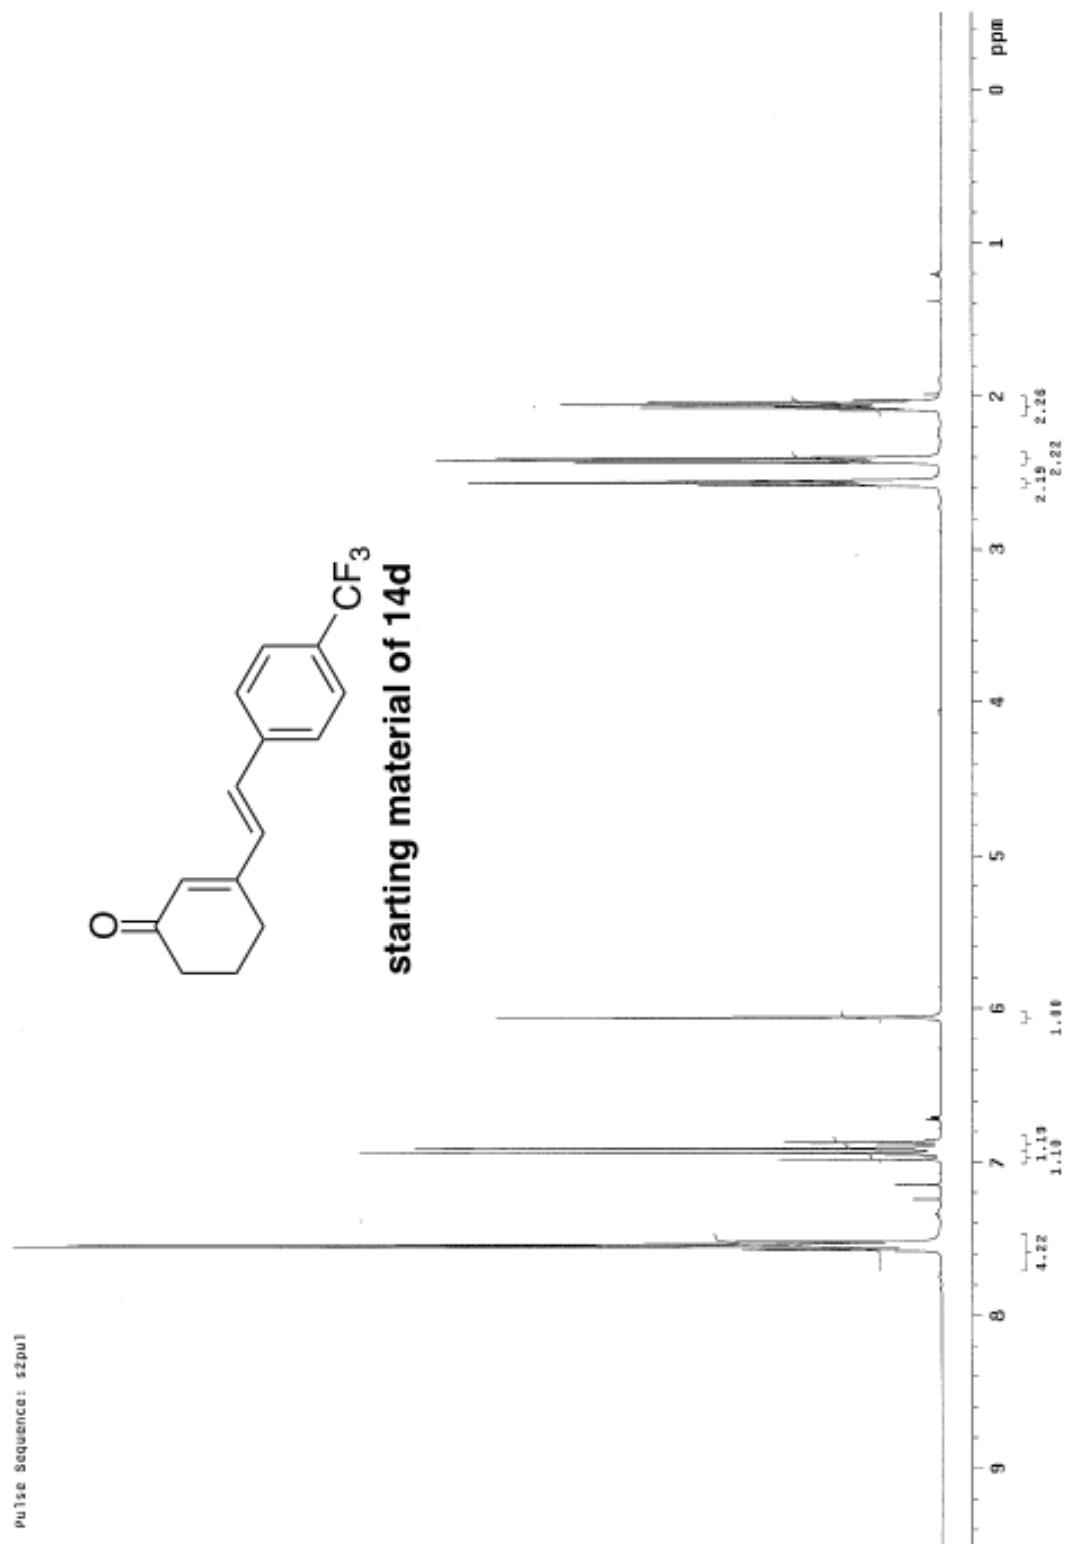

Sample: AL-Ex-251-JH  
 File: exp  
 Pulse Sequence: zgpg30  
 Solvent: cdcl3  
 Temp: 25.0 C / 298.1 K  
 VPROB: zgpg30  
 VNAME: 13c  
 Delay: 1.988 sec  
 Relax: 2.00000000 sec  
 Acq: 1.19160000 sec  
 W4: 4866.4 Hz  
 W2: 4866.4 Hz  
 L1: 601311.00 MHz  
 L2: 601311.00 MHz  
 L3: 601311.00 MHz  
 Q1: 1.00000000  
 Q2: 1.00000000  
 Q3: 1.00000000  
 Q4: 1.00000000  
 Q5: 1.00000000  
 Q6: 1.00000000  
 Q7: 1.00000000  
 Q8: 1.00000000  
 Q9: 1.00000000  
 Q10: 1.00000000  
 Q11: 1.00000000  
 Q12: 1.00000000  
 Q13: 1.00000000  
 Q14: 1.00000000  
 Q15: 1.00000000  
 Q16: 1.00000000  
 Q17: 1.00000000  
 Q18: 1.00000000  
 Q19: 1.00000000  
 Q20: 1.00000000  
 Q21: 1.00000000  
 Q22: 1.00000000  
 Q23: 1.00000000  
 Q24: 1.00000000  
 Q25: 1.00000000  
 Q26: 1.00000000  
 Q27: 1.00000000  
 Q28: 1.00000000  
 Q29: 1.00000000  
 Q30: 1.00000000  
 Q31: 1.00000000  
 Q32: 1.00000000  
 Q33: 1.00000000  
 Q34: 1.00000000  
 Q35: 1.00000000  
 Q36: 1.00000000  
 Q37: 1.00000000  
 Q38: 1.00000000  
 Q39: 1.00000000  
 Q40: 1.00000000  
 Q41: 1.00000000  
 Q42: 1.00000000  
 Q43: 1.00000000  
 Q44: 1.00000000  
 Q45: 1.00000000  
 Q46: 1.00000000  
 Q47: 1.00000000  
 Q48: 1.00000000  
 Q49: 1.00000000  
 Q50: 1.00000000  
 Q51: 1.00000000  
 Q52: 1.00000000  
 Q53: 1.00000000  
 Q54: 1.00000000  
 Q55: 1.00000000  
 Q56: 1.00000000  
 Q57: 1.00000000  
 Q58: 1.00000000  
 Q59: 1.00000000  
 Q60: 1.00000000  
 Q61: 1.00000000  
 Q62: 1.00000000  
 Q63: 1.00000000  
 Q64: 1.00000000  
 Q65: 1.00000000  
 Q66: 1.00000000  
 Q67: 1.00000000  
 Q68: 1.00000000  
 Q69: 1.00000000  
 Q70: 1.00000000  
 Q71: 1.00000000  
 Q72: 1.00000000  
 Q73: 1.00000000  
 Q74: 1.00000000  
 Q75: 1.00000000  
 Q76: 1.00000000  
 Q77: 1.00000000  
 Q78: 1.00000000  
 Q79: 1.00000000  
 Q80: 1.00000000  
 Q81: 1.00000000  
 Q82: 1.00000000  
 Q83: 1.00000000  
 Q84: 1.00000000  
 Q85: 1.00000000  
 Q86: 1.00000000  
 Q87: 1.00000000  
 Q88: 1.00000000  
 Q89: 1.00000000  
 Q90: 1.00000000  
 Q91: 1.00000000  
 Q92: 1.00000000  
 Q93: 1.00000000  
 Q94: 1.00000000  
 Q95: 1.00000000  
 Q96: 1.00000000  
 Q97: 1.00000000  
 Q98: 1.00000000  
 Q99: 1.00000000  
 Q100: 1.00000000  
 Total time 3 min, 21 sec

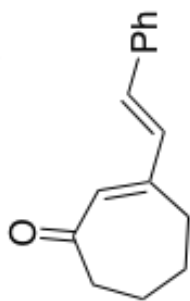

starting material of 17

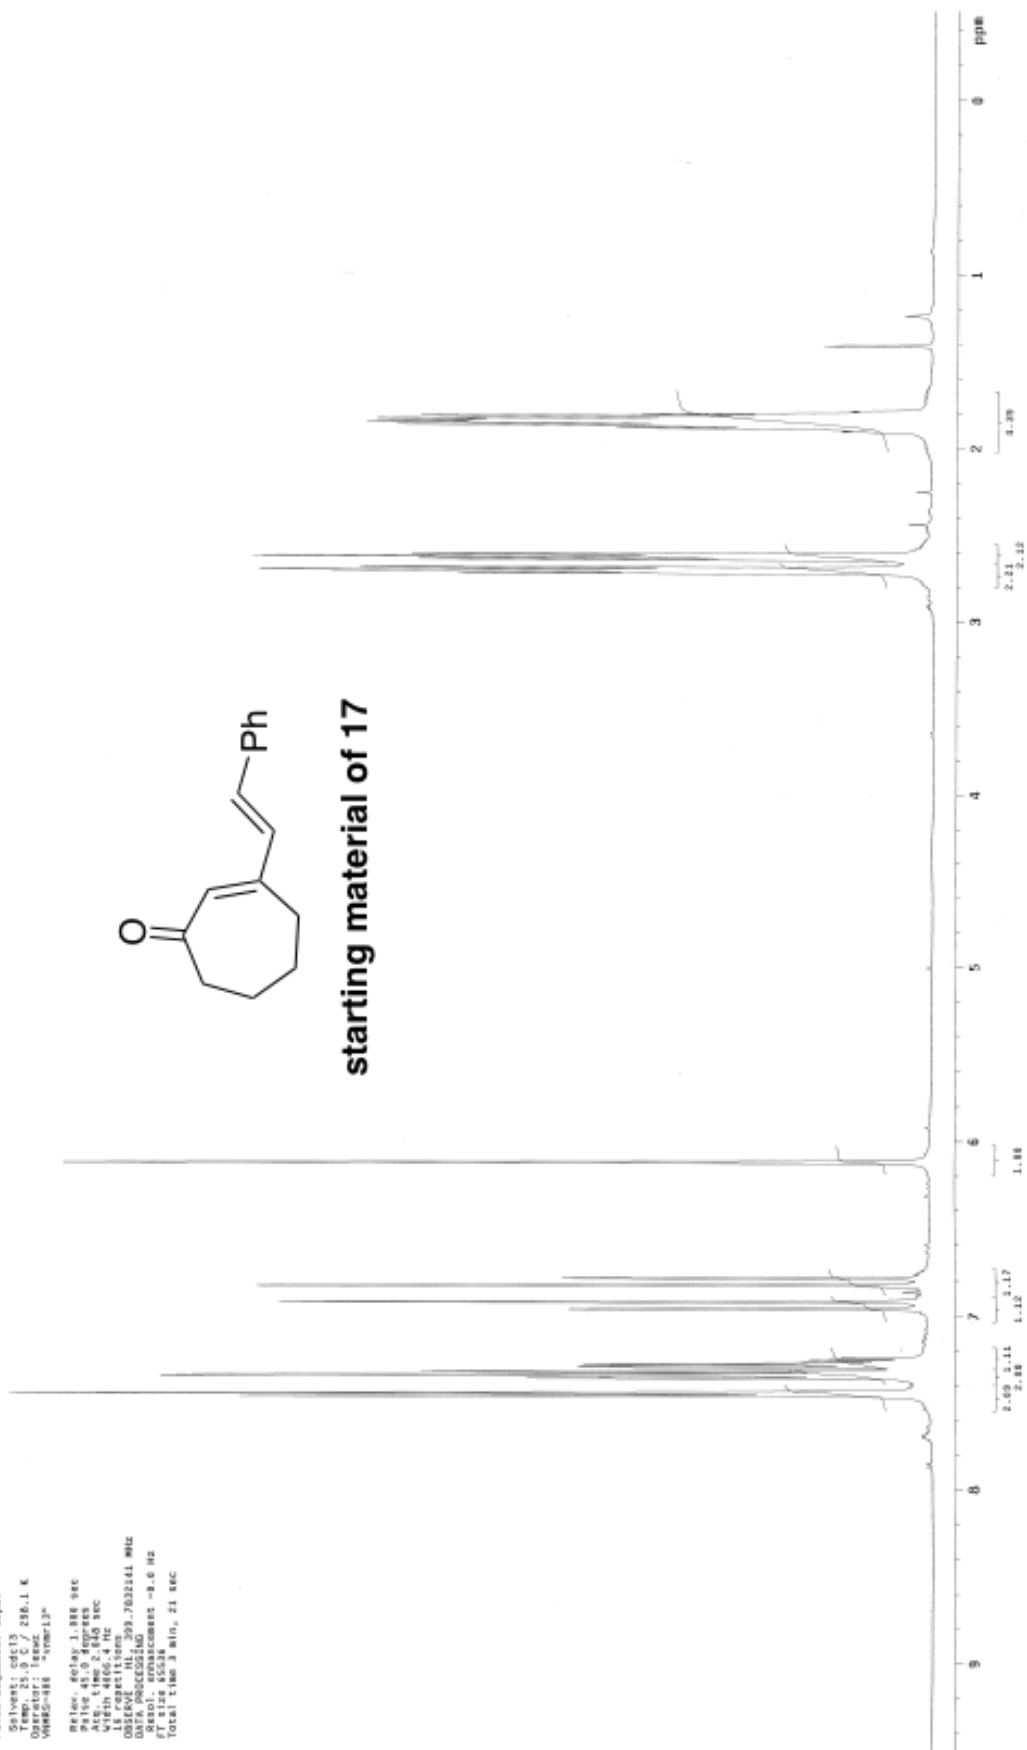

Supplement: NIHMS409246-supplement-1_si_001.pdf [file NIHMS409246-supplement-1_si_001.pdf]
